*ARTICLE*

*Title:*

**Assay to visualize specific protein oxidation reveals spatio-temporal regulation of SHP2**

*Authors:*

Ryouhei Tsutsumi<sup>1,\*</sup>, Jana Harizanova<sup>2</sup>, Rabea Stockert<sup>2</sup>, Katrin Schröder<sup>3</sup>, Philippe I. H. Bastiaens<sup>2,4</sup>, and Benjamin G. Neel<sup>1</sup>

*Affiliation:*

<sup>1</sup>Perlmutter Cancer Center, New York University Langone Medical Center, 430 East 29<sup>th</sup> Str., New York, NY10016, USA.

<sup>2</sup>Department of Systemic Cell Biology, Max Planck Institute of Molecular Physiology, Otto-Hahn-Str. 11, 44227 Dortmund, Germany.

<sup>3</sup>Institute of Physiology, Goethe-University, Theodor-Stern-Kai 7, 60590 Frankfurt, Germany.

<sup>4</sup>Faculty of Chemistry and Chemical Biology, Technical University of Dortmund, Otto-Hahn Str. 11, 44227 Dortmund, Germany.

\*Correspondence should be addressed to R.T. (e-mail: [Ryohei.Tsutsumi@nyumc.org](mailto:Ryohei.Tsutsumi@nyumc.org))

1 **Abstract**

2 **Reactive oxygen species (ROS) are produced transiently in response to cell stimuli,**  
3 **and function as second messengers that oxidize target proteins. Protein-tyrosine**  
4 **phosphatases (PTPs) are important ROS targets, whose oxidation results in rapid,**  
5 **reversible, catalytic inactivation. Despite increasing evidence for the importance of**  
6 **PTP oxidation in signal transduction, the cell biological details of ROS-catalyzed PTP**  
7 **inactivation have remained largely unclear, due to our inability to visualize PTP**  
8 **oxidation in cells. By combining proximity ligation assay (PLA) with chemical**  
9 **labeling of cysteine residues in the sulfenic acid state, we visualize oxidized Src**  
10 **homology 2 domain-containing protein-tyrosine phosphatase 2 (SHP2). We find that**  
11 **platelet-derived growth factor (PDGF) evokes transient oxidation on or close to**  
12 **RAB5+/EEA1- endosomes. SHP2 oxidation requires NADPH oxidases (NOXs), and**  
13 **oxidized SHP2 co-localizes with PDGF receptor and NOX1/4. Our data demonstrate**  
14 **spatially and temporally limited protein oxidation within cells, and suggest that**  
15 **PDGF-dependent “redoxosomes,” contribute to proper signal transduction.**

16

## 17 **Introduction**

18 Multiple studies suggest that ROS (e.g., superoxide ( $O_2^{\cdot-}$ ), hydrogen peroxide ( $H_2O_2$ ), nitric  
19 oxide (NO)) are not merely toxic byproducts of cellular metabolism, but also function as  
20 second messengers that regulate specific signaling molecules<sup>1</sup>. Various stimuli, including  
21 cytokines and growth factors, such as interleukin-1 (IL-1), tumor necrosis factor  $\alpha$  (TNF $\alpha$ )  
22 and PDGF, transiently evoke ROS production, and receptor-evoked ROS are required for  
23 precise regulation of at least some signal transduction events<sup>1</sup>. ROS can damage cellular  
24 macromolecules, suggesting that signal transduction-associated ROS must be regulated in a  
25 spatio-temporal manner. Several reports argue that production of ROS in response to IL-1  
26 or TNF $\alpha$  occurs in a specialized endosomal compartment, which has been termed the  
27 “redoxosome”<sup>2</sup>. Whether redoxosomes contribute to other types of signaling pathways  
28 (e.g., by classical growth factors) has remained unclear, and the identity of specific proteins  
29 oxidized by redoxosomes has remained elusive.

30 Protein-tyrosine phosphatases (PTPs) regulate intracellular signal transduction by  
31 receptor tyrosine kinases (RTKs), cytokine receptors and integrins<sup>3</sup>. All PTPs share a  
32 conserved active site “signature motif,”  $-[I/V]HCSXGXGR[S/T]G-$ , featuring an unusually  
33 acidic catalytic cysteinyl (Cys) residue that executes a nucleophilic attack on substrate  
34 phosphotyrosyl (p-Tyr) residues<sup>4</sup>. The same properties that confer a low  $pK_a$  on the  
35 catalytic cysteine also render it highly susceptible to oxidation<sup>3-5</sup>. Consequently, PTPs  
36 have emerged as important ROS targets, which undergo transient oxidation and inactivation

37 downstream of various upstream stimuli<sup>5-7</sup>.

38           In response to physiological levels of ROS, PTP catalytic Cys residues are  
39 oxidized to the sulfenic acid state (SOH). Depending upon the specific enzyme, this  
40 Cys-SOH rapidly reacts with the adjacent main chain amido-nitrogen to form an  
41 intramolecular sulfenylamide (S-N) bond<sup>7,8</sup>, or with a vicinal cysteinyl residue to form an  
42 intra- or intermolecular disulfide (S-S) bond<sup>7</sup>. These oxidized states of PTPs are  
43 reversible, and can be reduced by the glutathione (GSH) or thioredoxin systems. Higher  
44 levels of ROS result in biologically irreversible PTP oxidation to the sulfinic, sulfonic or  
45 sulfone states<sup>7</sup>. ROS-dependent, reversible inactivation of PTPs is believed to help fine  
46 tune phosphotyrosine-based signal transduction<sup>1,6,7</sup>. Support for this concept has been  
47 obtained mainly by biochemical approaches<sup>9-12</sup>, as technical limitations have, in general,  
48 precluded investigation of the spatio-temporal nature of PTP oxidation.

49           SHP2, encoded by *PTPN11*, is required for normal RAS/mitogen-activated  
50 protein kinase (MAPK) activation by multiple growth factors, including PDGF, epidermal  
51 growth factor (EGF), and many others<sup>13,14</sup>. SHP2 reportedly is oxidized in response to  
52 multiple cellular stimuli, including PDGF<sup>15,16</sup>, but the spatio-temporal dynamics, regulatory  
53 mechanism, physiological role and source of ROS for SHP2 oxidation have not been  
54 defined.

55           Here, we report an easy, sensitive, and potentially general method that  
56 specifically visualizes oxidized proteins. Focusing mainly on PDGF signaling, we find



57 that SHP2 oxidation in response to cell stimulation is regulated spatially and temporally.  
58 Combining our approach with “nearest neighbor” object-based image analysis, we show  
59 that SHP2 oxidation occurs at, or in close proximity to, RAB5+/early endosome antigen 1  
60 (EEA1)- endosomes, and requires specific cellular NOX proteins. Our results implicate  
61 “redoxosomes” in PDGF-dependent ROS production and signaling. Our assay also can  
62 visualize oxidation of another PTP, protein-tyrosine phosphatase 1B (PTP1B) in response to  
63 insulin.  
64

65 **Results**

66 **Visualization of oxidized SHP2 by dimedone-PLA**

67 Dimedone is a cell-permeable, soft nucleophile that reportedly labels cysteine-sulfenic  
68 acids state, but not cysteines in the thiol, disulfide, sulfinic or sulfonic acid state<sup>17,18</sup>. To  
69 evaluate the applicability of these observations to PTPs, we assessed the specificity in *in*  
70 *vitro* labeling experiments using PTP1B, the oxidation profile of which was established  
71 previously<sup>8</sup>. As monitored by *in vitro* phosphatase activity, purified recombinant PTP1B  
72 sequentially underwent reversible, followed by irreversible, oxidation, in response to  
73 increasing concentrations of H<sub>2</sub>O<sub>2</sub><sup>8</sup> (Supplementary Fig. 1a). Also, as expected<sup>19</sup>, PTP1B  
74 was oxidized irreversibly by treatment with pervanadate (Supplementary Fig. 1a). We  
75 then labelled PTP1B with dimedone (5 mM) in the presence of dithiothreitol (DTT), H<sub>2</sub>O<sub>2</sub>,  
76 or pervanadate, and detected dimedone-labeled PTP1B by immunoblotting with an  
77 antiserum that specifically recognizes dimedonylated cysteinyl residues<sup>20</sup>. Dimedone  
78 labelled PTP1B best at low H<sub>2</sub>O<sub>2</sub> concentrations, but did not react with PTP1B in the  
79 presence of pervanadate (Supplementary Fig. 1b). These data support the previous  
80 conclusion that dimedone reacts only with reversibly oxidized thiols<sup>18</sup>. Notably,  
81 pre-incubating purified PTP1B in 80 μM H<sub>2</sub>O<sub>2</sub> (which favors reversible oxidation) before  
82 labeling diminished the efficiency of dimedonylation, compared with simultaneous  
83 oxidation and dimedone-labeling (Supplementary Fig. 1c). Previous reports have shown  
84 that, upon initial oxidation, the cysteine-sulfenic acid of PTP1B (PTP1B-SOH) is converted

85 to an intramolecular sulfenylamide bond (PTP1B-SN) in PTP1B crystals<sup>8</sup> and in cells<sup>21</sup>.  
86 Taken together with these results, our biochemical data suggest that dimedone  
87 preferentially labels reversibly oxidized PTP1B in the PTP1B-SOH state, and labels the  
88 PTP1B-SN form poorly if at all (see Discussion).

89 We used anti-dimedone-Cys antiserum to immunostain oxidized proteins in Swiss  
90 3T3 mouse fibroblasts. Fibroblasts were exposed to PDGF (50 ng ml<sup>-1</sup>), H<sub>2</sub>O<sub>2</sub> (1 mM) or  
91 left untreated, and then labeled with dimedone (5 mM) for 5 min while undergoing  
92 paraformaldehyde-fixation. Fixed, dimedone-labeled cells were then immunostained with  
93 anti-dimedone-Cys antiserum. Consistent with an earlier report<sup>20</sup>, dimedone-labeled  
94 proteins were detected throughout cells, and total fluorescence intensity was increased  
95 slightly by H<sub>2</sub>O<sub>2</sub> treatment (Supplementary Fig. 1d). By contrast, PDGF-stimulation did  
96 not cause a detectable change in the total intensity of anti-dimedone-Cys immunolabeling,  
97 most likely reflecting a low amount of oxidized proteins in response to growth factor  
98 compared with H<sub>2</sub>O<sub>2</sub> (Supplementary Fig. 1d). Treatment of cells with excess H<sub>2</sub>O<sub>2</sub> (50  
99 mM) diminished anti-dimedone-Cys antibody labeling, again supporting the selectivity of  
100 dimedone for reversibly oxidized proteins (Supplementary Fig. 1e). Of note,  
101 anti-dimedone-Cys immunoblots of lysates from dimedone-labeled Swiss 3T3 cells  
102 (Supplementary Fig. 1f) revealed that SHP2 is not a major dimedone-labeled protein in  
103 these cells. Likewise, there was no appreciable change in overall fluorescence signal  
104 when immortalized mouse embryo fibroblasts (MEFs) with or without SHP2<sup>22</sup> were labeled

105 with dimedone and immunostained with anti-dimedone-Cys antibodies (Supplementary Fig.  
106 1g).

107 Therefore, we attempted to “optically purify” the oxidized SHP2 (ox-SHP2) signal  
108 from the large population of oxidized (and subsequently, dimedonylated) proteins in cells.  
109 To do so, we combined dimedone-labeling/anti-dimedone-Cys antibody binding with  
110 anti-SHP2 antibody binding, followed by PLA<sup>23</sup> (hereafter, dimedone-PLA). PLA detects  
111 any two antibodies that co-localize within ~40 nm<sup>23</sup>, in our method, anti-dimedone-Cys and  
112 anti-SHP2 antibodies, respectively (Fig. 1a). Dimedone-PLA for SHP2 visualized  
113 ox-SHP2 as puncta; notably, the number of puncta increased markedly in cells stimulated  
114 with PDGF-BB (50 ng ml<sup>-1</sup>), EGF (50 ng ml<sup>-1</sup>), or H<sub>2</sub>O<sub>2</sub> (1 mM) for 10 min (Fig. 1b and  
115 Supplementary Fig. 2a). Dimedone-PLA puncta were observed mainly in the cytoplasm  
116 (Fig. 1b), even though SHP2 is found both in the cytoplasm and the nucleus<sup>24</sup>.

117 Several lines of evidence indicate that these puncta represent ox-SHP2. First, the  
118 signals were eliminated in cells that did not undergo dimedone-labeling or that were  
119 incubated without anti-dimedone-Cys or anti-SHP2 antibodies (Supplementary Fig. 2b).  
120 Likewise, almost no puncta were observed in *Ptpn11*<sup>-/-</sup> MEFs, generated by Cre  
121 recombinase-mediated excision of a conditional (floxed) *Ptpn11* allele<sup>22</sup> (Fig. 1c).  
122 Re-expression of wild type (WT) SHP2, but not SHP2 bearing a C459E mutation  
123 (SHP2<sup>C459E</sup>) that alters the cysteinyl residue in the SHP2 “signature motif,” restored  
124 ROS-dependent puncta to *Ptpn11*<sup>-/-</sup> MEFs (Supplementary Fig. 2c,d). Depleting cellular

125 ROS with *N*-acetyl-*L*-cysteine (NAC) suppressed dimedone-PLA signals. Conversely,  
126 lowering glutathione levels by treatment with the glutathione synthesis inhibitor  
127 *L*-buthionine-*S,R*-sulfoximine (BSO), enhanced the PLA signal (Supplementary Fig. 2e).

128

### 129 **Dimedone-PLA also detects PTP1B oxidation**

130 In principle, our method should be applicable to any reversibly oxidized protein, as long as  
131 its oxidation proceeds through a sulfenic acid state and there is specific antibody for the  
132 protein that can be used for PLA. Indeed, we detected oxidized PTP1B (ox-PTP1B) in  
133 H<sub>2</sub>O<sub>2</sub>-treated Swiss 3T3 fibroblasts by dimedone-PLA (Supplementary Fig. 3a). Notably,  
134 PDGF did not increase the number of puncta for ox-PTP1B. Previous studies have shown  
135 that PTP1B oxidation is evoked by insulin stimulation<sup>21,25</sup>. As Swiss 3T3 fibroblasts  
136 respond weakly to insulin, we tested HepG2 cells (Supplementary Fig. 3b). HepG2 cells  
137 expressing shRNA against endogenous *PTPN1*, which encodes PTP1B, were infected with  
138 a lentivirus harboring either WT mouse PTP1B (mPTP1B) or a serine substitution mutant  
139 of the catalytic cysteine residue (mPTP1B<sup>C215S</sup>) (Supplementary Fig. 3c,d). As expected,  
140 insulin stimulation evoked a significant increase in dimedone-PLA signal in WT  
141 mPTP1B-expressing HepG2 cells, but not in cells expressing mPTP1B<sup>C215S</sup> (Fig. 2).  
142 These results indicate that our method is not restricted to ox-SHP2 detection, but is  
143 applicable to other PTPs, and likely non-PTPs as well.

144

## 145 **Localization of PDGF-evoked SHP2 oxidation**

146 Upon stimulation with appropriate growth factors, RTKs, including the PDGF receptor  
147 (PDGFR), are activated, trans-phosphorylated, and recruit multiple signal relay proteins  
148 containing SH2 or phosphotyrosine binding (PTB) domains, including SHP2<sup>26,27</sup>.  
149 Activated RTKs are endocytosed into clathrin-coated vesicles, clathrin dissociates, and  
150 transport occurs sequentially into early endosomes, late endosomes, and finally to  
151 lysosomes to be degraded. Some endocytosed RTKs can be recycled back to the plasma  
152 membrane<sup>27,28</sup>.

153 We asked when and where SHP2 oxidation occurs during this sequence.  
154 Stimulation of Swiss 3T3 cells with PDGF or EGF (50 ng ml<sup>-1</sup> each) led to a transient  
155 increase of ox-SHP2 to 2-3 fold over basal levels. Ox-SHP2 levels peaked at 5-10 min,  
156 and then decreased to ~1.5-fold basal levels by 60-120 min (Fig. 3a and Supplementary Fig.  
157 4a). These findings are consistent with previous biochemical studies that reported SHP2  
158 oxidation in response to PDGF stimulation<sup>15</sup>, although EGF-induced SHP2 oxidation has  
159 not been reported heretofore. Surface PDGFR $\beta$  was endocytosed rapidly, with decreased  
160 surface immunofluorescence detectable within 2.5 min after PDGF stimulation  
161 (Supplementary Fig. 4b). Hence, maximal SHP2 oxidation occurs at an early stage of  
162 PDGFR trafficking.

163 We next analyzed the dynamics of PDGF-induced SHP2 oxidation in space and  
164 time by co-staining dimedone-PLA-labeled cells with antibodies against PDGFR $\beta$ , clathrin

165 heavy chain (CHC), and the early endosome markers RAB5 and EEA1 at various times  
166 after PDGF addition. PDGFR, CHC and RAB5 fluorescence also localized to puncta,  
167 which overlapped with ox-SHP2 signals at different times after stimulation (Fig. 3b left).  
168 PLA generates relatively sparse, large and pleomorphic puncta, reflecting the extended  
169 DNA strands that amplify the fluorescence signals. Typical co-localization metrics, such  
170 as Pearson's or Manders' coefficients, are not appropriate for assessing co-localization  
171 between PLA signals and immunostained intracellular structures, as these coefficients  
172 assume that the intensity in each pixel represents a large number of molecules (also see  
173 Methods). To determine whether the ox-SHP2 signals were randomly (i.e., stochastically)  
174 distributed within cells, or rather were in association/proximity with specific intracellular  
175 compartments, we developed an object-based image analysis. The punctate signals for  
176 ox-SHP2 and each marker were segmented, the center of mass for each puncta was  
177 determined, and the distance of each ox-SHP2 signal to the nearest marker signal was  
178 quantified. Notably, the median distance from the ox-SHP2 puncta to the PDGFR $\beta$  or  
179 CHC signals showed a transient decrease at 2.5 min after PDGF stimulation to  $\sim 0.30$   $\mu\text{m}$  or  
180  $\sim 0.40$   $\mu\text{m}$ , respectively, whereas the distance from ox-SHP2 to RAB5 remained at  $\sim 0.30$   
181  $\mu\text{m}$  over the entire 120 min observation period (Fig. 3b right). The median radius of the  
182 ox-SHP2 puncta themselves was  $\sim 0.55$   $\mu\text{m}$ , which is larger than the distance between  
183 ox-SHP2 and the PDGFR $\beta$ , CHC and RAB5, respectively. Furthermore, the distance  
184 between PDGFR $\beta$ , CHC and RAB5 signals, respectively, was larger than the distance

185 between ox-SHP2 and each of these molecules (Supplementary Fig. 4c). By contrast, the  
186 median distance between ox-SHP2 and the nearest EEA1 signal was  $\sim 0.85 \mu\text{m}$  over the  
187 entire observation period, which was comparable to the median distance between each  
188 EEA1 punctum (Fig. 3b and Supplementary Fig. 4c). These data indicate that ox-SHP2 is  
189 transiently in close proximity to PDGFR $\beta$  and CHC at early times after PDGF stimulation,  
190 RAB5 and ox-SHP2 are constitutively in proximity, and ox-SHP2 does not co-localize with  
191 EEA1. Semi-super resolution microscopy (AiryScan) confirmed the adjacency of  
192 ox-SHP2 puncta with RAB5+, but not with EEA1+, vesicles (Fig. 3c). Consistent with  
193 these observations, ox-SHP2 did not co-localize with the late endosomal markers RAB7  
194 and RAB9 or with the recycling endosomal marker RAB11<sup>29</sup> (Supplementary Fig. 4d).  
195 PLA signals generated by anti-extracellular signal-regulated kinase 2 (ERK2) and  
196 anti-phospho ERK antibodies were distributed throughout the cytoplasm and nucleus, but  
197 showed no specific co-localization with RAB5 (Supplementary Fig. 4e). These results  
198 argue against artifactual co-localization of RAB5 with any punctate signal and for the  
199 specificity of ox-SHP2/RAB5 co-localization.

200 RAB5+ endocytic vesicles recruit EEA1 for tethering and fusion to early  
201 endosomes<sup>29,30</sup>. Therefore, our results suggest that SHP2 binds to, and is endocytosed  
202 with, PDGFR $\beta$  (or rapidly associates with the receptor at the clathrin-coated vesicle stage),  
203 and undergoes oxidation during the clathrin coated-vesicle/early phase of the endocytic  
204 process before reaching EEA1+ early endosomes. Consistent with this model,



205 immunostaining reveals the presence of a pool of RAB5+/EEA1- vesicles (Supplementary  
206 Fig. 4f). By contrast, ox-SHP2 signals do not colocalize with RAB5 in H<sub>2</sub>O<sub>2</sub>-treated cells  
207 (Supplementary Fig. 4g). Hence, H<sub>2</sub>O<sub>2</sub>-evoked SHP2 oxidation, unlike growth factor  
208 induced oxidation, does not proceed through an endosomal compartment and presumably  
209 can occur randomly in the cytoplasm. Failure of ox-SHP2 to co-localize with EEA1 at  
210 any time (Fig. 3b,c) presumably reflects reduction/re-activation of PDGFR-bound SHP2 at  
211 EEA1+ early endosomes or dissociation of ox-SHP2 from PDGFR.

212 To ask if growth factor-dependent receptor endocytosis is necessary for SHP2  
213 oxidation, we assessed the effects of the dynamin inhibitor Dynasore<sup>31</sup> and the clathrin  
214 inhibitor Pitstop<sup>®</sup> 2<sup>32</sup>. Treatment of Swiss 3T3 cells with either inhibitor abolished the  
215 PDGF-dependent increase of ox-SHP2 without affecting H<sub>2</sub>O<sub>2</sub>-evoked ox-SHP2 generation  
216 (Supplementary Fig. 5a). Expression of dynamin2<sup>K44A</sup>, which acts as a dominant negative  
217 mutant<sup>33</sup>, also suppressed PDGF-dependent SHP2 oxidation (Fig. 3d and Supplementary  
218 Fig. 5b). Collectively, these data establish that clathrin/dynamin-dependent endocytosis is  
219 necessary for PDGF-dependent SHP2 oxidation. However, inhibiting endocytosis (either  
220 pharmacologically or with dominant negative dynamin2) also decreased overall PDGFR $\beta$   
221 tyrosyl phosphorylation (Supplementary Fig. 5c,d). Therefore, it is unclear whether  
222 endocytosis is required to trigger SHP2 oxidation *per se* or merely is necessary for  
223 maximum PDGFR activation, and ultimately, PDGF-evoked ROS production.

224

225 **NOX complexes are necessary for PDGF-evoked SHP2 oxidation**

226 Since the first report of PDGF-induced ROS production by Finkel and co-workers<sup>34</sup>, the  
227 source, location and pathway mediating ROS generation have remained  
228 unclear/controversial. One proposed mechanism involves growth factor-evoked activation  
229 of non-phagocytic NOX complexes, possibly via phosphoinositide 3-kinase (PI3K) and the  
230 small G protein RAC1<sup>35,36</sup>. Other studies implicate mitochondria as the source of growth  
231 factor-evoked ROS, via a pathway involving p66SHC (Src homologous and collagen)<sup>37</sup>.  
232 NOX family members and the mitochondrial Complexes I/III produce  $O_2^{\cdot-}$ , which is  
233 dismutated to  $H_2O_2$  by superoxide dismutases (SODs)<sup>1</sup>. Catalase specifically decomposes  
234  $H_2O_2$ , and exogenous expression of a catalase mutant that localizes to the cytoplasm  
235 blocked PDGF-evoked SHP2 oxidation (Fig. 4a and Supplementary Fig. 6a). Hence,  
236  $H_2O_2$  is responsible for PDGF-dependent SHP2 oxidation. Furthermore, the NOX  
237 inhibitor diphenyleneiodonium (DPI) or the more selective inhibitor imipramine-blue<sup>38</sup>  
238 significantly suppressed PDGF-, but not  $H_2O_2$ -evoked SHP2 oxidation (Fig. 4b). By  
239 contrast, the mitochondria-targeted anti-oxidant MitoQ<sup>39</sup> had no apparent effect on  
240 PDGF-induced ox-SHP2 levels (Supplementary Fig. 6b). These results implicate NOX  
241 complex(es), rather than the mitochondrial electron transport chain, as the main source of  
242 ROS for PDGF-induced SHP2 oxidation. Consistent with a report implicating PI3K in  
243 PDGF-evoked ROS production<sup>36</sup>, the PI3K inhibitors LY294002 or BKM120 antagonized  
244 PDGF-evoked ox-SHP2 generation (Supplementary Fig. 6c,d).

245 In mice, the NOX family comprises six transmembrane heme-containing proteins  
246 (NOX1-4 and DUOX1,2)<sup>40</sup>. Each NOX or DUOX forms a complex with other subunits  
247 (e.g., p22phox or DUOXA1/2) that regulate NOX activity. The topology of NOX/DUOX  
248 complexes predicts that if activation were to occur at the plasma membrane, then reduction  
249 of NADPH to NADP<sup>+</sup> on the cytoplasmic side of membranes would be coupled to  
250 extracellular O<sub>2</sub><sup>·-</sup> production. O<sub>2</sub><sup>·-</sup> could move to the cytosol through a specific transporter  
251 or dismutate to H<sub>2</sub>O<sub>2</sub>, and then access the cytosol via channels or by diffusion<sup>40</sup>, although  
252 such a process would seem to be inefficient.

253 To evaluate the involvement of specific NOXs in PDGF-evoked SHP2 oxidation,  
254 we used primary mouse dermal fibroblasts (MDFs) from wild type (WT-MDF) or *Nox1*,  
255 *Nox2*, and *Nox4* triple-knockout animals (TKO-MDF) (ref. 41 and Supplementary Fig.  
256 7a,b). Consistent with our inhibitor experiments, PDGF-, but not H<sub>2</sub>O<sub>2</sub>-evoked SHP2  
257 oxidation was abrogated in TKO-MDFs compared with their WT counterparts (Fig. 4c).  
258 Hence, PDGF-induced SHP2 oxidation requires NOX1, NOX2 and/or NOX4.

259

### 260 **Ox-SHP2 localizes with endosomes containing NOX proteins**

261 To obtain insight into which NOX complex(es) is/are involved in PDGF-dependent SHP2  
262 oxidation, we co-stained ox-SHP2 with antibodies for each of the NOXs or p22phox.  
263 NOX proteins and p22phox showed punctate staining, some of which overlapped with  
264 ox-SHP2 PLA puncta (Fig. 4d top). Using object-based image analysis, we found that

265 PDGF-evoked ox-SHP2 signals were closely associated with NOX1 (median distance  
266  $\sim 0.26 \mu\text{m}$ ), NOX4 (median distance  $\sim 0.27 \mu\text{m}$ ) and p22phox (median distance  $\sim 0.26 \mu\text{m}$ ),  
267 but not with NOX2 or NOX3 (median distances  $\sim 0.65 \mu\text{m}$  and  $\sim 0.87 \mu\text{m}$ , respectively)  
268 (Fig. 4d bottom). Again, the median distances of ox-SHP2 puncta to NOX1, NOX4, or  
269 p22phox puncta were significantly less than those between NOX puncta themselves  
270 (Supplementary Fig. 7c). Proximity of ox-SHP2 to NOX1, NOX4 and p22phox was  
271 observed before and after PDGF stimulation (Supplementary Fig. 7c), and semi-super  
272 resolution microscopy confirmed the adjacency of ox-SHP2 to NOX1 and NOX4  
273 (Supplementary Fig. 7d). NOX1 and NOX4 were not visualized at the plasma membrane,  
274 mitochondria or in EEA1+ vesicles, although we cannot exclude the possibility that a small  
275 fraction of these proteins are found in these structures. Nevertheless, immunostaining  
276 revealed NOX1/4 localization to vesicular-like structures that partially co-localized with the  
277 ER marker calnexin (Supplementary Fig. 7e). The specificity of each of these antibodies  
278 for their respective NOX protein was confirmed by comparing staining of WT- and  
279 TKO-MDFs (Supplementary Fig. 7b).

280 Taken together, our data implicate NOX1 and/or NOX4 in PDGF-evoked SHP2  
281 oxidation. Because our experiments also show that SHP2 oxidation occurs on, or close to,  
282 RAB5+ endosomes (see Fig. 3b,c), the overlap of ox-SHP2, NOX1 and/or NOX4 signals  
283 presumably occurs on, or close to, such vesicles, which also contain ligand-bound,  
284 endocytosed PDGFR. EGF-evoked SHP2 oxidation also occurred in close proximity to

285 RAB5 and NOX1/4 (Supplementary Fig. 7f). These findings argue that SHP2 oxidation  
286 occurs on, or close to, endosomal structures marked by RAB5, but not EEA1, that promote  
287 localized ROS generation, consistent with “redoxosomes<sup>2</sup>”. Although our object-based  
288 analysis has insufficient resolution to determine whether SHP2 oxidation actually occurs on  
289 (versus close to) these structures, we note that earlier biochemical studies indicated that  
290 SHP2 oxidation was strictly associated with the PDGFR (which, in turn, would be on  
291 endocytosed vesicles)<sup>15</sup>.

292

### 293 **PDGF-evoked redoxosome formation**

294 The “redoxosome” model proposes that IL-1 or TNF $\alpha$  generates NOX-containing,  
295 redox-active endosomes wherein ROS generation is directed into membrane-enclosed  
296 vesicles (as a consequence of NOX topology)<sup>2</sup>. Our data suggest that PDGF stimulation  
297 also promotes redoxosome generation; i.e., NOX1 and/or NOX4 are recruited following  
298 PDGFR endocytosis, contribute to ROS production at RAB5+ endosomes, and result in  
299 oxidation of SHP2 (and possibly other targets). Indeed, NOX1 and NOX4 showed partial,  
300 but significant co-localization with RAB5 (Supplementary Fig. 8a). When calculated by  
301 Manders’ coefficient, RAB5 co-localization with NOX1/NOX4 decreased slightly upon  
302 PDGF stimulation, although substantial co-localization remained (Supplementary Fig. 8a).  
303 On the other hand, NOX4 and p22phox, and to a lesser extent, NOX1, showed strongly  
304 increased co-localization with PDGFR $\beta$  at 5 min after PDGF stimulation (Fig. 5a),

305 indicating recruitment of NOX proteins to PDGFR-containing vesicles.

306 To localize PDGF-evoked ROS generation, we utilized the sensor HyPer3<sup>42</sup>,  
307 targeted selectively to different intracellular locales. HyPer3 is a circularly permuted  
308 yellow fluorescent protein (cpYFP) integrated into the regulatory domain of the  
309 H<sub>2</sub>O<sub>2</sub>-sensing protein OxyR, which exhibits increased fluorescence intensity in response to  
310 increased local concentrations of H<sub>2</sub>O<sub>2</sub><sup>42</sup>. Time-lapse imaging of Swiss 3T3 fibroblasts  
311 showed that the fluorescence intensity of HyPer3 fused to the KRAS C-terminal sequence  
312 (HyPer3-tk), which is targeted to the plasma membrane, as well as that of HyPer3 fused to  
313 RAB5 (HyPer3-RAB5) such that the sensor faces the cytosol on RAB5+ vesicles, increased  
314 within 3-6 min of PDGF stimulation (Fig. 5b). By contrast, there was no detectable  
315 increase in the fluorescence of cytoplasmic HyPer3 (HyPer3-cyto) or HyPer3 fused with  
316 RAB7 (HyPer3-RAB7) in response to PDGF (Fig. 5b). Notably, EGFP, which is not  
317 sensitive to H<sub>2</sub>O<sub>2</sub>, fused to the KRAS C-terminal sequence or to RAB5 showed no  
318 PDGF-evoked change in fluorescence (Supplementary Fig. 8b). Furthermore, PDGF did  
319 not evoke significant ROS production at RAB5+ endosomes in TKO-MDFs  
320 (Supplementary Fig. 8c).

321 Collectively, these data strongly support a model in which PDGF-stimulation  
322 evokes formation of redoxosomes, recruiting and/or activating NOX complexes adjacent to  
323 the endocytosed PDGFR. Recruited NOX complexes catalyze ROS generation at these  
324 RAB5+ endosomes, resulting in spatially limited SHP2 oxidation. Alternatively,

325 SHP2-containing RAB5+/EEA1- vesicles could be recruited adjacent to, and possibly in  
326 contact with, NOX1/4-containing regions of the ER, resulting in exposure of RAB5+  
327 vesicles/SHP2 to ER-localized ROS generation.

328

### 329 **Redoxosomes prevent precocious PDGFR $\beta$ dephosphorylation**

330 To assess the physiological role of PDGF-evoked redoxosome formation/SHP2 oxidation,  
331 we monitored the phosphorylation of PDGFR $\beta$  and its downstream signaling components  
332 in TKO-MDFs. PDGFR $\beta$  was degraded with similar kinetics following PDGF stimulation  
333 of WT- and TKO-MDFs (Supplementary Fig. 9a,b). In WT-MDFs, the relative tyrosyl  
334 phosphorylation of PDGFR $\beta$  peaked at around 10 min after stimulation, followed by a  
335 decay of phosphorylation at 30-120 min (Supplementary Fig. 9a,c). Compared with  
336 WT-MDFs, TKO-MDFs showed significantly decreased phosphorylation of Y579, Y716,  
337 Y857 and Y1009 in PDGFR $\beta$  at early times after ligand stimulation (1 min and 2.5 min),  
338 but comparable phosphorylation levels at later times (10 min and later; Fig. 6a and  
339 Supplementary Fig. 9a,c). These phosphorylation differences correlate temporally with  
340 ROS production at RAB5+ vesicles as detected by HyPer3 (Fig. 5b), ox-SHP2 generation  
341 (Fig. 3a), and ox-SHP2 localization near the PDGFR $\beta$  (Fig. 3b). Tyr-857 is an  
342 auto-phosphorylation site, which is necessary to enhance the kinase activity of PDGFR $\beta$ ,  
343 whereas Y579, Y716 and Y1009 are reported binding sites for SHC/SRC/signal transducer  
344 and activator of transcription 5 (STAT5), growth factor receptor binding protein 2

345 (GRB2)/SOS and phospholipase C $\gamma$  (PLC $\gamma$ )/SHP2, respectively<sup>27</sup>. Consistent with  
346 decreased phosphorylation of the latter PDGFR $\beta$  tyrosyl residues, phosphorylation of  
347 MEK1 (MAP kinase or ERK kinase-1) at S217 and S221 was decreased significantly in  
348 TKO-MDFs (Fig. 6b). Importantly, treatment with the allosteric SHP2 inhibitor SHP099<sup>43</sup>  
349 partially restored PDGFR $\beta$  tyrosine phosphorylation in TKO-MDFs, while having almost  
350 no effect on WT-MDFs (Fig. 6c). These data suggest that redoxosome generation  
351 spatially and temporally inhibits SHP2 and other PTPs to enable the proper level of PDGFR  
352 activation specifically at early times after ligand stimulation.

353         Notably, PDGF-dependent activation of ERK was suppressed by SHP099 in WT-  
354 and TKO-MDFs, regardless of PDGFR $\beta$  phosphorylation/activation (Fig. 6c). Hence,  
355 SHP2 has spatially distinct actions on negative regulation of the PDGFR, which appears  
356 only in the absence of NOX1/2/4, and on positive regulation in RAS/ERK pathway  
357 activation, respectively.

358



359 **Discussion**

360 Biochemical evidence has argued for an important role for growth factor-induced ROS  
361 production in cellular signaling<sup>1</sup> and for PTPs as critical ROS targets<sup>6,7</sup>. Yet with the  
362 exception of a conformation-specific scFv (single-chain variable fragment) that selectively  
363 detects the sulfenylamide form of PTP1B<sup>21</sup>, there has been no way to visualize oxidized  
364 PTPs or other proteins within cells. We capitalized on the preferential reactivity of  
365 dimedone for the SOH form of oxidized protein-thiols<sup>17,18</sup>, the availability of  
366 anti-dimedone-Cys antiserum<sup>20</sup> and the highly sensitive and specific PLA method<sup>23</sup> to  
367 visualize growth factor-evoked SHP2 oxidation.

368 Our experiments confirm that dimedone preferentially labels reversibly oxidized  
369 PTPs, most likely in the PTP-SOH state (Supplementary Fig. 1a-c). PTP-sulfenic acids  
370 convert to intramolecular sulfenylamides<sup>8</sup> or disulfides<sup>44</sup> *in vitro*, sulfenylamide state has  
371 been detected in cells by a PTP1B-SN-specific scFv<sup>21</sup>. However, the kinetics and  
372 stoichiometry of these conversions are unclear, due to our inability to monitor each of these  
373 forms in cells. Accordingly, these observations do not exclude the possibility of a pool of  
374 the PTP-SOH form in cells. Indeed, our *in vitro* dimedone-labeling experiments,  
375 combined with our dimedone-PLA results, strongly suggest that PTP-SOH species exist in  
376 cells.

377 Most importantly, our results show that SHP2 oxidation is regulated in space and  
378 time, and provide support for the “redoxosome” model<sup>2</sup>. We propose that

379 PDGF-dependent redoxosome formation and SHP2 oxidation occur as follows: 1) Upon  
380 PDGF stimulation, PDGFR is activated, phosphorylated and recruits SHP2 and other  
381 signaling molecules; 2) PDGFR is endocytosed in a clathrin/dynamin-dependent manner,  
382 and recruits NOX1/4 at the endosomes; 3) PDGFR and NOX-containing vesicles, via a  
383 PI3K activity-dependent process, produce  $O_2^{\cdot-}$  in their interiors; 4)  $O_2^{\cdot-}$  is either dismutated  
384 inside the vesicle or diffuses to the cytoplasm to be dismutated, in either case generating a  
385 localized  $H_2O_2$  gradient; and 5) SHP2 bound to PDGFR and possibly other PTPs at/close to  
386 the redoxosome are oxidized by localized  $H_2O_2$ , resulting in temporal inactivation of PTP  
387 activity around PDGFR (Fig. 6d). Although PDGF evokes co-localization of PDGFR $\beta$   
388 and NOX proteins (Fig. 5a), how NOX1/4 is recruited to PDGFR containing endosome  
389 remains to be elucidated. Conceivably, a small amount of plasma membrane-associated  
390 NOXs are co-endocytosed with PDGFR to form redoxosomes. Alternatively, a fraction of  
391 NOX proteins reside on cytoplasmic vesicular structures and these vesicles are recruited  
392 and possibly fuse with PDGFR-containing endocytic vesicles. We also cannot exclude the  
393 possibility that endocytosing vesicles are close enough to the ER or other structures where  
394 NOXs reside and produce ROS.

395 The “redoxosomes” in IL-1 or TNF $\alpha$  signaling are reportedly RAB5+/EEA1+<sup>2,45</sup>.  
396 Redoxosome-produced ROS is required for TNF receptor-associated factor 6 (TRAF6)  
397 recruitment to the endocytosed IL-1 receptor complex and for TRAF2 recruitment to the  
398 TNF receptor complex, and consequently, for nuclear factor- $\kappa$ B (NF- $\kappa$ B) activation in

399 response to these ligands<sup>2</sup>. However, the critical target molecule(s) of ROS-evoked  
400 oxidation for TNF $\alpha$ /IL-1 signal transduction has(ve) not been identified. Although  
401 PDGF-stimulation also induces structures consistent with redoxosomes, these structures are  
402 RAB5+/EEA1- (Fig. 3b,c). Whether RTK- and cytokine-evoked redoxosomes form in  
403 distinct locations, or instead, these discrepancies reflect technical differences, requires  
404 clarification. Notably, the earlier experiments could have enabled labeling of vesicles that  
405 contain RAB5 and EEA1 even if ROS production had occurred only in the RAB5+/EEA1-  
406 compartment<sup>45</sup>. Importantly, our assay enabled us to visualize a key signal relay molecule,  
407 SHP2, undergoing physiological oxidation on, or in close proximity to, these structures,  
408 providing direct evidence of spatially limited redoxosome-dependent protein oxidation.  
409 Furthermore, our results suggest that redoxosome-mediated oxidation events are likely to  
410 be common to a wide variety of receptor systems.

411 In the absence of ROS production at redoxosomes (i.e., in TKO-MDFs), failure to  
412 inhibit SHP2 and/or other PTPs at endocytic vesicles diminishes PDGFR and MEK  
413 activation in response to PDGF (Fig. 6). However, genetic and biochemical evidence  
414 implicates SHP2, and in particular, its catalytic activity, as a positive (i.e., signal enhancing)  
415 regulator of growth factor-dependent RAS/ERK activation<sup>13,14</sup>. Previous work also  
416 indicates that SHP2 dephosphorylates the PDGFR<sup>15</sup>. Our observation that PDGFR-bound  
417 SHP2 is oxidized/inactivated at early time-points, together with the requirement of SHP2  
418 activity for ERK activation, indicates that these two roles for SHP2 are spatially segregated

419 and differentially regulated by ROS. Presumably, critical SHP2 substrates for RAS/ERK  
420 activation are accessed either before or after redoxosome action or at a distinct intracellular  
421 location. Recent data also suggest that SHP2 could have distinct functions proximal to,  
422 and distal from, EGFR activation<sup>46</sup>.

423 Our results indicate NOX1/4-dependent SHP2 oxidation occurs in close proximity  
424 to specific endosomes in growth factor-stimulated fibroblasts. Previous reports showed  
425 that NOX2 is responsible for SHP2 oxidation in erythropoietin-stimulated endothelial  
426 progenitors<sup>47</sup> and that NOX4 is necessary for shear stress-evoked SHP2 oxidation in aortic  
427 endothelial cells<sup>48</sup>, but those studies could not provide spatial information. These findings  
428 do, however, imply that different NOX(s) catalyze SHP2 oxidation in different cells or  
429 signaling contexts, perhaps dependent on differential NOX expression. Another report  
430 argued that p66SHC and mitochondria are critical for PDGF-evoked ROS production and  
431 oxidation of PTPs, including SHP2<sup>37</sup>. Although strong suppression of oxidized PTPs was  
432 observed in p66SHC-depleted cells when compared with normal cells, p66SHC-depleted  
433 cells still showed a PDGF-dependent increase of PTP oxidation in their experiments.  
434 Hence, PDGF might stimulate p66SHC/mitochondria-dependent and -independent ROS  
435 production.

436 Multiple PTPs are purported targets of ROS-catalyzed oxidation<sup>1,6,7</sup> and PTPs have  
437 multiple, and distinct, functions in cell signaling<sup>3</sup>. Restricting their oxidation spatially and  
438 temporally is likely to be of critical importance, and visualizing such events is of clear

439 interest. Yet with the exception of PTP1B oxidation in response to insulin stimulation<sup>21</sup>,  
440 visualization of intracellular oxidation events has not been reported heretofore.  
441 Dimedone-PLA can also recognize insulin-evoked ox-PTP1B (Fig. 2), but because it  
442 capitalizes on the intrinsic chemistry of cysteine oxidation, our method is, in principle,  
443 adaptable to all PTP superfamily members, as well as any protein-thiols for which an  
444 appropriate antibody is available.

445

446 **Methods**

447 **Cell Culture**

448 Swiss 3T3 (3T3 Swiss albino) cells, *Ptpn11*<sup>fl/fl</sup> MEFs expressing CRE-ER<sup>Tam</sup> (ref. 22), and  
449 HepG2 cells were cultured in Dulbecco-modified Eagle's medium (DMEM), supplemented  
450 with 10% fetal bovine serum (FBS). To induce deletion of *Ptpn11*, *Ptpn11*<sup>fl/fl</sup> MEFs were  
451 treated with 1  $\mu$ M 4-hydroxytamoxifen (4OHT) for 4 days. Primary mouse dermal  
452 fibroblasts (MDFs)<sup>41</sup> were cultured in DMEM/F-12 supplemented with 10% FBS. Swiss  
453 3T3 cells and HepG2 cells were from a Neel lab-maintained stock, and were authenticated  
454 by the CellCheck short tandem repeat (STR) profiling service (IDEXX BioResearch). All  
455 cells were tested for mycoplasma using the Mycoplasma Plus detection kit (Agilent).

456

457 **Antibodies**

458 Mouse monoclonal anti-SHP2 (B-1, sc-7384), anti-PDGFR $\beta$ -pY716 (F-10, sc-365464),  
459 anti-ERK2 (D-2, sc-1647), and anti-RAB5A antibody (E-11, sc-166600), as well as rabbit  
460 polyclonal anti-SHP2 (C-18, sc-280), anti-PDGFR $\beta$  (958, sc-432), anti-PDGFR $\beta$ pY579  
461 (sc-135671), and anti-calnexin (H-70, sc-11397), goat polyclonal anti-PDGFR $\beta$  (M-20,  
462 sc-1627), anti-clathrin heavy chain (C-20, sc-6579), anti-RAB5A (P-12, sc-26566),  
463 anti-EEA1 (C-15, sc-6414), anti-NOX1 (H-15, sc-5821), anti-NOX2 (C-15, sc-5827),  
464 anti-NOX3 (A-12, sc-34699), anti-NOX4 (N-15, sc-21860), and anti-p22phox (C-17,  
465 sc-11712) antibodies were purchased from Santa Cruz Biotechnology. Mouse monoclonal

466 anti-MEK1 (61B12, #2352) and anti-AKT1 (2H10, #2967), rabbit monoclonal  
467 anti-PDGFR $\beta$ pY857 (C43E9, #3170), anti-PDGFR $\beta$ pY1009 (42F9, #3124) and anti-pAKT  
468 T308 (244F9, #4056), as well as rabbit polyclonal anti-EEA1 (C45B10, #3288),  
469 anti-pMEK S217/221 (#9121) and anti-pERK1/2 T202/Y204 (#9101) antibodies were  
470 purchased from Cell Signaling. Mouse monoclonal anti-phosphotyrosine antibody cocktail  
471 (4G10 platinum, 05-1050) and rabbit anti-dimethylolated cysteine antiserum (anti-cysteine  
472 sulfenic acid, 07-2139) were purchased from Millipore. Mouse monoclonal anti-PTP1B  
473 (ab201974) and chicken polyclonal anti-GFP (ab13970) antibodies were purchased from  
474 Abcam. Goat polyclonal anti-PTP1B (AF3954) and anti-PDGFR $\beta$  (AF1042) antibodies  
475 were purchased from R&D Systems. Mouse anti-FLAG antibody (M2, F1804) was  
476 purchased from Sigma. Alexa fluor-conjugated secondary antibodies (Thermo Fisher) were  
477 used for immunostaining. All antibodies were used at the concentrations recommended by  
478 their manufacturers (1:1000 for immunoblotting and 1:500 for immunostaining), except for  
479 anti-SHP2, anti-PTP1B antibodies and anti-dimethylolated cysteine antiserum for  
480 dimedone-PLA (see below).

481

## 482 **Growth Factors and Chemical Compounds**

483 Recombinant human PDGF-BB and EGF were purchased from Peprotech.  
484 5,5-Dimethyl-1,3-cyclohexanedione (dimedone), *para*-nitrophenyl phosphate (*p*NPP),  
485 4-Hydroxytamoxifen (4OHT), *N*-acetyl-*L*-cysteine (NAC), *L*-buthionine-*S,R*-sulfoximine

486 (BSO), and diphenyleneiodonium (DPI) were purchased from Sigma. Catalase (*Aspergillus*  
487 *niger*) was purchased from Millipore. Dynasore<sup>31</sup> was kindly provided by Dr. T.  
488 Kirchhausen (Harvard Med. Sch.) or purchased from Sigma. Pitstop<sup>®</sup> 2<sup>32</sup> was purchased  
489 from Abcam. Imipramine-blue<sup>38</sup> was synthesized and kindly provided by Drs. N. Patel and  
490 H.W. Pauls (Campbell Family Institute for Breast Cancer Research, Princess Margaret  
491 Cancer Center, University Health Network, Toronto, Canada). MitoQ (Mitoquinone)<sup>39</sup> was  
492 purchased from BioTrend. SHP099<sup>43</sup> was purchased from Alputon Inc. Rhodamine  
493 phalloidin was purchased from Thermo Fisher Scientific.

494

#### 495 **Expression Constructs**

496 Retroviral expression vectors for wild type SHP2 (WT SHP2) and C459E SHP2  
497 (SHP2<sup>C459E</sup>) were generated by subcloning human *PTPN11* cDNA into  
498 pMSCV-IRES-EGFP (Clontech). pSUPER-puro-based control shRNA or sh*PTPNI*  
499 retroviral expression vectors were designed to target  
500 5'-CCGCCAGAGGAGCTATATTC-3' or 5'-CCGCCAAAGGAGTTACATTC-3',  
501 respectively, as reported<sup>49</sup>. Expression vectors for WT mPTP1B or mPTP1B<sup>C215S</sup> were  
502 generated by subcloning the appropriate cDNAs into the lentiviral expression vector  
503 pFB-neo. Expression vectors for EGFP-fused RAB5A, RAB7A, RAB9A, and RAB11A  
504 and pEGFP-WT Dynamin 2 and Dynamin2<sup>K44A</sup> were purchased from Addgene. A cDNA of  
505 mouse catalase which lacks its peroxisome-targeting sequence was purchased from



506 Addgene, and subcloned into pMSCV-IRES-EGFP, adding a start codon followed by a  
507 FLAG-tag encoding sequence at the 5' end. Expression vectors for HyPer3-tk,  
508 HyPer3-RAB5 and HyPer3-RAB7 were generated by fusing cDNAs for either the human  
509 KRAS C-terminal sequence, human *RABA5A* or *RAB7A* (Addgene) to the 3' end of *HyPer3*  
510 cDNA, respectively. All constructs were confirmed by DNA sequencing.

511

### 512 **Transfection, Infection and Cell Sorting**

513 Swiss 3T3 cells were transfected with the indicated expression vectors using  
514 Lipofectamine3000 (Thermo Fisher), according to the manufacturer's protocol.  
515 Twenty-four hours post-transfection, GFP-positive cells were isolated by FACS using a  
516 MoFlo (Beckman Coulter), and then were seeded for dimedone-PLA, immunostaining or  
517 immunoblotting. *Ptpn11<sup>fl/fl</sup>* MEFs expressing WT SHP2, or SHP2<sup>C459E</sup>, and Swiss 3T3 cells  
518 expressing FLAG-catalase were generated by retroviral infection, according to the  
519 manufacturer's protocol (pMSCV retrovirus system, Clontech) followed by FACS for  
520 GFP-positive cells. HepG2 cells were infected stably with VSVG-pseudotyped retrovirus  
521 carrying control shRNA or sh*PTPN1*, and selected in puromycin. Cells were further  
522 infected with VSVG-pseudotyped retrovirus carrying expression vector for WT mPTP1B or  
523 mPTP1B<sup>C215S</sup>, and selected in geneticin (G418).

524

### 525 **In Vitro Phosphatase Assay and Dimedone-Labeling**

526 Purified recombinant human PTP1B (1-321) was kindly provided by Dr. N.K. Tonks (Cold  
527 Spring Harbor Laboratory, New York). PTP1B ( $0.5 \mu\text{g ml}^{-1}$ ) was pre-incubated in a buffer  
528 containing 12.5 mM Hepes (pH 7.4), 0.25 mM EDTA and 35  $\mu\text{M}$  DTT in the presence of  
529 10 mM DTT, 80  $\mu\text{M}$   $\text{H}_2\text{O}_2$ , 320  $\mu\text{M}$   $\text{H}_2\text{O}_2$  or 1 mM pervanadate for 30 min at room  
530 temperature (R.T.). To measure reversibility of oxidation, aliquots from these reactions  
531 were incubated further in the presence of 10 mM DTT and 5 U of catalase at R.T. for 3 h.  
532 Catalytic activity was then measured by using *p*NPP as substrate and pre-incubated PTP1B  
533 (125 ng) in 200  $\mu\text{l}$  of phosphatase assay buffer (25 mM Hepes pH 7.4, 50 mM NaCl, 10  
534 mM *p*NPP) for 5 min at 37°C. For *in vitro* dimedone-labeling, purified PTP1B ( $0.25 \mu\text{g}$   
535  $\mu\text{l}^{-1}$ ) was incubated for 5 min at R.T. in the presence or absence of 5 mM dimedone in  
536 labeling buffer (12.5 mM Hepes, pH 7.4, 0.25 mM EDTA and 35  $\mu\text{M}$  DTT) containing a  
537 final concentration of 10 mM DTT, 80  $\mu\text{M}$   $\text{H}_2\text{O}_2$ , 320  $\mu\text{M}$   $\text{H}_2\text{O}_2$  or 1 mM pervanadate, as  
538 indicated. Two  $\mu\text{l}$  of each reaction were diluted into 148  $\mu\text{l}$  of SDS-PAGE sample buffer,  
539 and subjected to SDS-PAGE, followed by immunoblotting with anti-dimedone-Cys and  
540 anti-PTP1B antibodies. For post-oxidation dimedone-labeling, purified PTP1B ( $0.5 \mu\text{g} \mu\text{l}^{-1}$ )  
541 was first incubated in labeling buffer with 10 mM DTT, 80  $\mu\text{M}$   $\text{H}_2\text{O}_2$ , or 320  $\mu\text{M}$   $\text{H}_2\text{O}_2$  at  
542 R.T. for 30 min, and then further incubated for 5 min at R.T. after addition of an equal  
543 amount of 10 mM dimedone solution containing the same concentration of DTT or  $\text{H}_2\text{O}_2$ .

544

545 **Dimedone-PLA**

546 Swiss 3T3 ( $2 \times 10^4$ ) or HepG2 ( $5 \times 10^4$ ) cells were seeded on 12 mm, poly-*L*-lysine-coated  
547 circular glass coverslips, and then were serum-starved for 16 h. After stimulation with the  
548 indicated growth factor or H<sub>2</sub>O<sub>2</sub>, cells were rinsed with PBS and fixed with 4%  
549 paraformaldehyde/PBS containing 5 mM dimedone/0.25% DMSO for 5 min at R.T. The  
550 dimedone-containing fixation solution was prepared fresh before each experiment and  
551 filtrated through a PES membrane with pore size=0.22  $\mu$ m (Millipore). Cells were then  
552 rinsed 6 times with PBS, permeabilized with 0.1% TritonX-100/0.2% BSA/PBS for 10 min,  
553 and blocked in 1% BSA/PBS for 30 min. After incubation with primary antibodies  
554 (anti-SHP2 antibody: 1:5,000 or anti-PTP1B: 1:2,000, with anti-dimedonylated cysteine  
555 antiserum: 1:1,000) for 1 h at R.T., cells were subjected to PLA (Duolink In Situ Detection  
556 Reagents Red, Sigma) with donkey anti-mouse (Duolink In Situ PLA Probe Anti-Mouse  
557 MINUS, Sigma) or donkey anti-goat (Duolink In Situ PLA Probe Anti-Goat MINUS,  
558 SIGMA) and anti-rabbit (Duolink In Situ PLA Probe Anti-Rabbit PLUS, SIGMA)  
559 secondary antibodies, according to the manufacturer's protocol. After the PLA procedure,  
560 cells were subjected to another round of sequential incubation with primary and Alexa  
561 fluorophore-conjugated secondary antibodies for co-staining with markers or NOX proteins.  
562 Coverslips were then mounted on glass slides using Prolonggold containing DAPI (Thermo  
563 Fisher). Images were obtained by using an LSM700 confocal microscopy system (Carl  
564 Zeiss). Semi-super resolution microscopic images (AiryScan) were obtained by using an  
565 LSM880 (Carl Zeiss).

566

### 567 **Immunofluorescence**

568 Cells ( $4 \times 10^4$  for anti-dimedone-Cys staining or  $2 \times 10^4$  for other immunostaining) were  
569 seeded on coverslips as above, fixed in 4% paraformaldehyde/PBS for 10 min at R.T.,  
570 permeabilized with 0.1% TritonX-100, 0.2% BSA/PBS for 10 min, and blocked with 1%  
571 BSA/PBS for 30 min, followed by sequential primary and secondary antibody treatments,  
572 as indicated. Images were obtained by using an LSM700 or an LSM880.

573

### 574 **Immunoblotting**

575 Cells were lysed in SDS lysis buffer (50 mM Tris-HCl pH7.5, 100 mM NaCl, 1 mM EDTA,  
576 1% SDS, 2 mM  $\text{Na}_3\text{VO}_4$ ), and subjected to SDS-PAGE, followed by transfer to  
577 Immobilon-FL PVDF membranes (Millipore). Membranes were blocked in 1% BSA/TBS  
578 containing 0.1% Tween20 for 30 min, and treated with primary antibodies in blocking  
579 buffer for 1 h, followed by treatment with IRDye-conjugated secondary antibodies  
580 (LI-COR). Images were obtained by using an ODYSSEY CLx quantitative IR fluorescent  
581 detection system (LI-COR), and quantified with Image Studio software Ver. 5.2 (LI-COR).

582

### 583 **Live-cell Imaging**

584 Expression vectors for HyPer3 or its mutants were transfected into Swiss 3T3 fibroblasts  
585 using Lipofectamine 3000 (Thermo Fisher), as per the manufacturer's protocol. Twelve

586 hours after transfection, cells were re-seeded ( $1 \times 10^4$  cells/well) into glass-bottom 8-well  
587 lab-tech chambers (Nunc) or  $\mu$ -Slide 8 Well (ibidi), and then serum-starved in phenol  
588 red-free DMEM for 16 h. The fluorescence intensities of HyPer3-expressing cells were  
589 monitored by using an LSM700 confocal microscopy system with a stage-top incubator at  
590 37°C in a 5% CO<sub>2</sub> atmosphere. Excitation was at 488 nm, and emission was monitored at  
591 500-1000 nm. Images were obtained every 1 min, with PDGF added after the third scan.  
592 Cells that showed shrinking or detachment during the time-lapse were excluded from the  
593 analyses.

594

### 595 **Image Analysis**

596 For dimedone-PLA images, the number of punctate signals generated by PLA and nuclei  
597 were counted from a single image by using the “analyze particle” function of FIJI/ImageJ  
598 software<sup>50</sup>. HepG2 cell nuclei were counted manually. The number of PLA signals per cell  
599 was calculated by dividing the particle number by the number of nuclei in an image,  
600 averaging 6 images per condition. To assess the localization of ox-SHP2 within intracellular  
601 compartments, we employed object-based analysis, which enabled us to compare one signal  
602 representing many molecules (e.g., RAB5, EEA1, etc.) with another (PLA) representing a  
603 resolution-limited, sparse number of molecules. For object-based image analyses, regions  
604 of interest (ROIs) were set according to cell shape using FIJI/ImageJ software<sup>50</sup>, and the  
605 region of the nucleus (stained with DAPI) was masked using CellProfiler software<sup>51</sup>.

606 Punctate signals from PLA (red) and marker staining (green) were segmented by using Otsu  
607 threshold algorithm in CellProfiler<sup>51</sup>. The centers of mass (CM) of the segmented objects  
608 were determined by using MATLAB software (The MathWorks, Inc.). To evaluate potential  
609 co-localization the nearest neighbor approach was applied by finding the distances between  
610 the CMs of each red/green object to the nearest of the green objects in each cell. The  
611 outliers in the obtained distances distributions were removed by using Tukey's method<sup>52</sup>,  
612 and the median distances of red-to-green and green-to-green in each cell ( $n = 50$  cells per  
613 condition) obtained using custom MATLAB scripts were subjected to statistical analyses.  
614 For pixel-based co-localization analyses,  $225 \mu\text{m}^2$  (Fig. 5a) or  $56.25 \mu\text{m}^2$  (Supplementary  
615 Fig. 8a) ROIs were set in cytoplasmic region of individual cells. Manders' and Pearson's  
616 coefficients were calculated by setting the same threshold for ROIs for samples stained with  
617 the same antibody, using the "coloc2" function in FIJI/ImageJ software<sup>50</sup>. For HyPer3  
618 experiments, fluorescence intensities of each cell were obtained by setting a ROI according  
619 to the cell shape, and subtracting background values. Relative fluorescence intensities were  
620 calculated by setting the average intensity of the first 3 images (before PDGF stimulation)  
621 to 1.

622

### 623 **Statistics and Reproducibility**

624 No statistical method was used to predetermine sample sizes. Samples were not randomized.

625 The investigators were not blinded to allocation during experiments or outcome assessment.

626 Sample sizes and statistical tests for each experiment are denoted in the figure legends.  
627 Dimedone-PLA images shown in each panel represent one biological replicate. Each  
628 dimedone-PLA experiment was performed at least twice (biological replicates), with  
629 quantification of 6 fields of images (technical replicates), except Fig. 3d (15 cells), per  
630 condition of the experiment. The absolute number of PLA puncta per cell in the same  
631 culture condition varies between biological replicates, presumably because of subtle  
632 differences in experimental conditions, but the fold-changes in number of PLA puncta  
633 between the various conditions were reproducible. Therefore, each graph for PLA  
634 quantification shows the result of one of the biological replicates. Each immunoblot was  
635 performed four times (biological replicates) for quantification, or at least twice (biological  
636 replicates) for expression checks. Each dimedone-PLA/marker co-staining experiment or  
637 conventional immunostaining experiment was performed at least twice, and representative  
638 images from one of the biological replicates are shown in each panel. Pixel-based image  
639 analysis was performed with 10 (Fig. 5a) or 20 (Supplementary Fig. 8a) ROIs from 10 cells  
640 per condition from one of the biological replicates, and object-based image analysis was  
641 performed with 50 cells per condition. The results of live cell imaging are from independent  
642 biological replicates. Statistical analysis was performed by using the two-tailed Welch's *t*  
643 test (Figs. 1b, 5a, Supplementary Fig. 4c, 7c, 8a, 8c), unpaired/paired two-tailed *t* test (Fig.  
644 6c, Supplementary Figs. 4c, 7c, 8a, 9c), or ANOVA with Bonferroni/Dunn's post-hoc test  
645 (Figs. 1c, 2, 3b, 3d, 4a, 4b, 4c, Supplementary Figs. 1d, 1e, 1g, 2a, 2b, 2c, 2e, 3a, 5a, 6c,

646 6d) by using StatView software, where appropriate. Precise P values can be found in the  
647 figures.

648

#### 649 **Data Availability**

650 Source data for figures are available from the corresponding author upon request.

651

#### 652 **Code Availability**

653 Computer codes for image analyses are available from the corresponding author upon  
654 request.

655



656 **References**

- 657 1. Holmström, K. M. & Finkel T. Cellular mechanisms and physiological consequences  
658 of redox-dependent signalling. *Nat Rev. Mol. Cell. Biol.* **15**, 411-421 (2014).
- 659 2. Spencer, N. Y. & Engelhardt J. F. The basic biology of redoxosomes in  
660 cytokine-mediated signal transduction and implications for disease-specific therapies.  
661 *Biochemistry* **53**, 1551-1564 (2014).
- 662 3. Tonks, N. K. Protein tyrosine phosphatases: from genes, to function, to disease. *Nat.*  
663 *Rev. Mol. Cell. Biol.* **7**, 833-846 (2006).
- 664 4. Zhang, Z. Y. & Dixon, J. E. Protein tyrosine phosphatases: mechanism of catalysis and  
665 substrate specificity. *Adv. Enzymol. Relat. Areas Mol. Biol.* **68**, 1-36 (1994).
- 666 5. Peters, G. H., Frimurer, T. M. & Olsen, O. H. Electrostatic evaluation of the signature  
667 motif (H/V)CX5R(S/T) in protein-tyrosine phosphatases. *Biochemistry* **37**, 5383-5393  
668 (1998).
- 669 6. Tonks, N. K. Redox redux: revisiting PTPs and the control of cell signaling. *Cell* **121**,  
670 667-670 (2005).
- 671 7. Tanner, J. J., Parsons, Z. D., Cummings, A. H., Zhou, H. & Gates, K. S. Redox  
672 regulation of protein tyrosine phosphatases: structural and chemical aspects. *Antioxid.*  
673 *Redox Signal.* **15**, 77-97 (2011).
- 674 8. Salmeen, A. *et al.* Redox regulation of protein tyrosine phosphatase 1B involves a  
675 sulphenyl-amide intermediate. *Nature* **423**, 769-773 (2003).

- 676 9. Meng, T. C., Hsu, S. F. & Tonks, N. K. Development of a modified in-gel assay to  
677 identify protein tyrosine phosphatases that are oxidized and inactivated in vivo.  
678 *Methods* **35**, 28-36 (2005).
- 679 10. Boivin, B., Zhang, S., Arbiser, J. L., Zhang, Z. Y. & Tonks, N. K. A modified  
680 cysteinyl-labeling assay reveals reversible oxidation of protein tyrosine phosphatases  
681 in angiomyolipoma cells. *Proc. Natl. Acad. Sci. USA* **105**, 9959-9964 (2008).
- 682 11. Karisch, R. *et al.* Global proteomic assessment of the classical protein-tyrosine  
683 phosphatome and "Redoxome". *Cell* **146**, 826-840 (2011).
- 684 12. Paulsen, C. E. *et al.* Peroxide-dependent sulfenylation of the EGFR catalytic site  
685 enhances kinase activity. *Nat. Chem. Biol.* **11**, 57-64 (2011).
- 686 13. Chan, G., Kalaitzidis, D. & Neel, B. G. The tyrosine phosphatase Shp2 (PTPN11) in  
687 cancer. *Cancer Metastasis Rev.* **27**, 179-192 (2008).
- 688 14. Grossmann, K. S., Rosário, M., Birchmeier, C. & Birchmeier, W. The tyrosine  
689 phosphatase Shp2 in development and cancer. *Adv. Cancer Res.* **106**, 53-89 (2010).
- 690 15. Meng, T. C., Fukada, T. & Tonks, N. K. Reversible oxidation and inactivation of  
691 protein tyrosine phosphatases in vivo. *Mol. Cell* **9**, 387-399 (2002).
- 692 16. Kwon, J. *et al.* Receptor-stimulated oxidation of SHP-2 promotes T-cell adhesion  
693 through SLP-76-ADAP. *EMBO J.* **24**, 2331-2341 (2005).
- 694 17. Nelson, K. J. *et al.* Use of dimedone-based chemical probes for sulfenic acid detection  
695 methods to visualize and identify labeled proteins. *Methods Enzymol.* **473**, 95-115

- 696 (2010).
- 697 18. Poole, L. B., Zeng, B. B., Knaggs, S. A., Yakubu, M. & King, S. B. Synthesis of  
698 chemical probes to map sulfenic acid modifications on proteins. *Bioconjug Chem.* **16**,  
699 1624-1628 (2005).
- 700 19. Huyer, G. *et al.* Mechanism of inhibition of protein-tyrosine phosphatases by vanadate  
701 and pervanadate. *J. Biol. Chem.* **272**, 843-851 (1997).
- 702 20. Seo, Y. H. & Carroll, K. S. Profiling protein thiol oxidation in tumor cells using  
703 sulfenic acid-specific antibodies. *Proc. Natl. Acad. Sci. USA* **106**, 16163-16168 (2009).
- 704 21. Haque, A., Andersen, J. N., Salmeen, A., Barford, D. & Tonks, N. K.  
705 Conformation-sensing antibodies stabilize the oxidized form of PTP1B and inhibit its  
706 phosphatase activity. *Cell* **147**, 185-198 (2011).
- 707 22. Yang, W. *et al.* An Shp2/SFK/Ras/Erk signaling pathway controls trophoblast stem cell  
708 survival. *Dev. Cell* **10**, 317-327 (2006).
- 709 23. Weibrecht, I. *et al.* Proximity ligation assays: a recent addition to the proteomics  
710 toolbox. *Expert Rev. Proteomics* **7**, 401-409 (2010).
- 711 24. Tsutsumi, R. *et al.* YAP and TAZ, Hippo signaling targets, act as a rheostat for nuclear  
712 SHP2 function. *Dev. Cell* **26**, 658-665 (2013).
- 713 25. Meng, T. C., Buckley, D. A., Galic, S., Tiganis, T. & Tonks, N. K. Regulation of insulin  
714 signaling through reversible oxidation of the protein-tyrosine phosphatases TC45 and  
715 PTP1B. *J. Biol. Chem.* **279**, 37716-37725 (2004).

- 716 26. Lemmon, M. A. & Schlessinger, J. Cell signaling by receptor tyrosine kinases. *Cell* **141**,  
717 1117-1134 (2010).
- 718 27. Heldin, C. H. & Lennartsson, J. Structural and functional properties of platelet-derived  
719 growth factor and stem cell factor receptors. *Cold Spring Harb. Perspect. Biol.* **5**,  
720 a009100, doi: 10.1101/cshperspect.a009100 (2013).
- 721 28. Goh, L. K. & Sorkin, A. Endocytosis of receptor tyrosine kinases. *Cold Spring Harb.*  
722 *Perspect. Biol.* **5**, a017459, doi: 10.1101/cshperspect.a017459 (2013).
- 723 29. Somsel Rodman, J. & Wandinger-Ness, A. Rab GTPases coordinate endocytosis. *J.*  
724 *Cell Sci.* **13**, 183-192 (2000).
- 725 30. Simonsen, A. *et al.* EEA1 links PI(3)K function to Rab5 regulation of endosome fusion.  
726 *Nature* **394**, 494-298 (1998).
- 727 31. Macia, E. *et al.* Dynasore, a cell-permeable inhibitor of dynamin. *Dev. Cell* **10**,  
728 839-850 (2006).
- 729 32. von Kleist, L. *et al.* Role of the clathrin terminal domain in regulating coated pit  
730 dynamics revealed by small molecule inhibition. *Cell* **146**, 471-484 (2011).
- 731 33. Damke, H., Baba, T., Warnock, D. E. & Schmid, S. L. Induction of mutant dynamin  
732 specifically blocks endocytic coated vesicle formation. *J. Cell Biol.* **127**, 915-934  
733 (1994).
- 734 34. Sundaresan, M., Yu, Z. X., Ferrans, V. J., Irani, K. & Finkel, T. Requirement for  
735 generation of H<sub>2</sub>O<sub>2</sub> for platelet-derived growth factor signal transduction. *Science* **270**,

- 736 296-299 (1995).
- 737 35. Sundaresan, M. *et al.* Regulation of reactive-oxygen-species generation in fibroblasts  
738 by Rac1. *Biochem J.* **318**, 379-382 (1996).
- 739 36. Bae, Y. S. *et al.* Platelet-derived growth factor-induced H<sub>2</sub>O<sub>2</sub> production requires the  
740 activation of phosphatidylinositol 3-kinase. *J. Biol. Chem.* **275**, 10527-10531 (2000).
- 741 37. Frijhoff, J. *et al.* The mitochondrial reactive oxygen species regulator p66Shc controls  
742 PDGF-induced signaling and migration through protein tyrosine phosphatase oxidation.  
743 *Free Radic Biol Med* **68**, 268-277 (2014).
- 744 38. Munson, J. M. *et al.* Anti-invasive adjuvant therapy with imipramine blue enhances  
745 chemotherapeutic efficacy against glioma. *Sci. Transl. Med.* **4**, 127ra36, doi:  
746 10.1126/scitranslmed.3003016 (2012).
- 747 39. Kelso, G. F. *et al.* Selective targeting of a redox-active ubiquinone to mitochondria  
748 within cells: antioxidant and antiapoptotic properties. *J. Biol. Chem.* **276**, 4588-4596  
749 (2001).
- 750 40. Bedard, K. & Krause, K. H. The NOX family of ROS-generating NADPH oxidases:  
751 physiology and pathophysiology. *Physiol. Rev.* **87**, 245-313 (2007).
- 752 41. Rezende, F. *et al.* Unchanged NADPH Oxidase Activity in Nox1-Nox2-Nox4 Triple  
753 Knockout Mice: What Do NADPH-Stimulated Chemiluminescence Assays Really  
754 Detect? *Antioxid. Redox Signal.* doi:10.1089/ars.2015.6314 (2015).
- 755 42. Bilan, D. S. *et al.* HyPer-3: a genetically encoded H<sub>2</sub>O<sub>2</sub> probe with improved

- 756 performance for ratiometric and fluorescence lifetime imaging. *ACS Chem. Biol.* **8**,  
757 535-542 (2013).
- 758 43. Chen, Y. N. *et al.* Allosteric inhibition of SHP2 phosphatase inhibits cancers driven by  
759 receptor tyrosine kinases. *Nature* **535**, 148-152 (2016).
- 760 44. Chen, C. Y., Willard, D. & Rudolph, J. Redox regulation of SH2-domain-containing  
761 protein tyrosine phosphatases by two backdoor cysteines. *Biochemistry* **48**, 1399-1409  
762 (2009)
- 763 45. Li, Q. *et al.* Nox2 and Rac1 regulate H<sub>2</sub>O<sub>2</sub>-dependent recruitment of TRAF6 to  
764 endosomal interleukin-1 receptor complexes. *Mol. Cell. Biol.* **26**, 140-154 (2006).
- 765 46. Furcht, C. M., Buonato, J. M. & Lazzara, M. J. EGFR-activated Src family kinases  
766 maintain GAB1-SHP2 complexes distal from EGFR. *Sci. Signal.* **8**, ra46, doi:  
767 10.1126/scisignal.2005697 (2015).
- 768 47. Schröder, K. *et al.* NADPH oxidase Nox2 is required for hypoxia-induced mobilization  
769 of endothelial progenitor cells. *Circ Res.* **105**, 537-544 (2009).
- 770 48. Francisco, J. *et al.* NOX4-dependent Hydrogen peroxide promotes shear stress-induced  
771 SHP2 sulfenylation and eNOS activation. *Free Radic. Biol. Med.* **89**, 419-430 (2015).
- 772 49. Banh, R. S. *et al.* PTP1B controls non-mitochondrial oxygen consumption by  
773 regulating RNF213 to promote tumour survival during hypoxia. *Nat. Cell Biol.* **18**,  
774 803-813 (2016).
- 775 50. Schindelin, J. *et al.* Fiji: an open-source platform for biological-image analysis. *Nature*

776 *methods* **9**, 676-682 (2012).

777 51. Kamentsky, L. *et al.* Improved structure, function, and compatibility for CellProfiler:  
778 modular high-throughput image analysis software. *Bioinformatics* **27**, 1179-1180  
779 (2011)

780 52. Tukey, J. *Exploratory Data Analysis*. Addison-Wesley, 43-44 (1977).

781

782

783 **ACKNOWLEDGEMENTS**

784 We thank Drs. T. Kirchhausen (Harvard Medical School), N. Patel, H.W. Pauls (UHN  
785 Research, Toronto, Canada), and N.K. Tonks (Cold Spring Harbor Laboratory) for materials,  
786 Ms. X. Wang and Mr. R.S. Banh (Neel lab) for plasmids. We also thank Dr. J. Jonkman  
787 (UHN Research, Toronto, Canada) for technical instruction and Dr. M. Philips (NYU  
788 Medical Center) for helpful comments and discussion. This work was supported by NIH  
789 R37 CA49132 (to B.G.N.), and by grants from the Deutsche Forschungsgemeinschaft  
790 (DFG) SFB 974 (to P.I.H.B. and R.S.), SFB815/TP1 and SCHR1241/1-1 (to K.S.). B.G.N.  
791 was also a Canada Research Chair, Tier 1, and work in his Toronto lab was partially  
792 supported by the Princess Margaret Cancer Foundation. R.T. was supported by a  
793 Postdoctoral Fellowship for Research Abroad of the Japan Society for the Promotion of  
794 Science (JSPS).

795

796 **AUTHOR CONTRIBUTIONS**

797 R.T., P.I.H.B. and B.G.N. designed the research. R.T. performed experiments with the help  
798 of R.S. R.T. and J.H. analyzed the data. K.S. provided *Nox1,2,4*-triple KO MDFs. P.I.H.B.  
799 and R.S. provided HyPer3 expression vectors. R.T. and B.G.N. wrote the paper with advice  
800 from K.S. and P.I.H.B. B.G.N provided overall supervision for the research.

801

802 **COMPETING FINANCIAL INTERESTS**



803 The authors declare no competing financial interests.

804

805 **MATERIALS & CORRESPONDENCE.**

806 Correspondence should be addressed to Ryouhei Tsustumi (e-mail:

807 [Ryohei.Tsustumi@nyumc.org](mailto:Ryohei.Tsustumi@nyumc.org))

808

809 **Figure Legends**

810 **Fig. 1.** Detection of oxidized SHP2 by dimedone-PLA. **(a)** Schematic illustrating method  
811 for detecting oxidized SHP2 by dimedone-PLA. **(b)** Serum-starved Swiss 3T3 cells were  
812 stimulated with PDGF-BB (50 ng ml<sup>-1</sup>) for 10 min or left unstimulated. Cells were fixed in  
813 the presence of dimedone (5 mM) for 5 min, and subjected to dimedone-PLA (red). Nuclei  
814 were stained with DAPI (blue). Representative images are shown for each condition from  
815 one of > 4 independent biological replicates. A higher magnification image of the boxed  
816 region is shown at the bottom right. The graph shows the average number of PLA signals  
817 per cell ( $n = 6$  images for each condition, 5-20 cells in an image), relative to control cells  
818 without stimulation (set as 1). The P value was calculated using a two-tailed Welch's  $t$  test.  
819 Error bars represent SD. **(c)** Serum-starved *Ptpn11*<sup>fl/fl</sup> MEFs expressing CRE-ER<sup>Tam</sup> treated  
820 with or without 4-hydroxytamoxifen (4OHT) were stimulated with PDGF-BB (50 ng ml<sup>-1</sup>)  
821 or H<sub>2</sub>O<sub>2</sub> (1 mM) for 10 min. Cells were fixed in the presence of dimedone, and subjected to  
822 dimedone-PLA (gray). Representative images are shown for each condition from one of 3  
823 independent experiments. The graph shows average number of PLA signals per cell ( $n = 6$   
824 images for each condition, 5-20 cells in an image), relative to control cells without  
825 stimulation (set as 1). \*\*\* $P < 0.0001$ , ANOVA with Bonferroni/Dunn's post-hoc test. Error  
826 bars represent SD. Scale bars: 50  $\mu$ m.

827

828 **Fig. 2.** Detection of oxidized PTP1B by dimedone-PLA. Serum-starved HepG2 cells  
829 expressing control shRNA or shRNA targeting human *PTPNI* (*shPTPNI*), with or without  
830 stable expression of either mouse WT PTP1B or PTP1B<sup>C215S</sup>, were stimulated with insulin  
831 (25 nM) or H<sub>2</sub>O<sub>2</sub> (1 mM) for 5 min or left unstimulated. Cells were then subjected to  
832 dimedone-PLA with anti-dimedone-Cys and anti-mouse PTP1B antibodies (gray).  
833 Representative images are shown for each condition from one of 2 independent biological  
834 replicates. The graph shows the average number of PLA signals per cell ( $n = 6$  images for  
835 each condition, 80-120 cells in an image), relative to control cells without stimulation (set  
836 as 1). \*\*\* $P < 0.0001$ , ns: not significant, ANOVA with Bonferroni/Dunn's post-hoc test.  
837 Error bars represent SD. Scale bar: 50  $\mu\text{m}$ .

838

839 **Fig. 3.** Spatio-temporal dynamics of SHP2 oxidation. (a) Serum-starved Swiss 3T3 cells  
840 were stimulated with PDGF-BB (50 ng ml<sup>-1</sup>) for the indicated times, and subjected to  
841 dimedone-PLA. Representative images are shown for each condition from one of 2  
842 independent experiments. The graph shows the average number of PLA signals per cell ( $n =$   
843 6 images for each condition, 5-20 cells in an image), relative to unstimulated control cells  
844 (normalized to 1). Scale bar: 50  $\mu\text{m}$ . (b) Serum-starved Swiss 3T3 cells were stimulated  
845 with PDGF-BB (50 ng ml<sup>-1</sup>) for the indicated times. Dimedone-PLA (magenta) and  
846 co-staining with the indicated markers (green) are shown. Nuclei were stained with DAPI  
847 (blue). Representative images are shown for each condition from one of 3 independent

848 experiments. Higher magnification images of the boxed regions are shown. Median  
849 distances of centers of mass (CM) between punctate signals of ox-SHP2 and the nearest  
850 indicated marker signal in cells were obtained by the object-based image analysis. The  
851 box-whisker plots show the median inter-object distances at the indicated times after  
852 stimulation ( $n = 50$  cells, each time point). Boxes indicate the 25<sup>th</sup>-75<sup>th</sup> percentile; whiskers  
853 represent the 5<sup>th</sup>-95<sup>th</sup> percentile. \*\*\* $P < 0.0001$ , ANOVA with Bonferroni/Dunn's post-hoc  
854 test. Scale bar: 10  $\mu\text{m}$ . (c) Serum-starved Swiss 3T3 cells were stimulated with PDGF-BB  
855 ( $50 \text{ ng ml}^{-1}$ ) for 10 min, and subjected to dimedone-PLA (magenta) and co-staining with  
856 indicated antibodies (green). Representative semi-super resolution microscopic images  
857 (AiryScan) and higher magnification images of the boxed region from one of 2 independent  
858 experiments are shown. Scale bars: 5  $\mu\text{m}$ . (d) Swiss 3T3 cells expressing EGFP,  
859 EGFP-fused wild type dynamin2 (WT Dynamin2) or dominant-negative dynamin2  
860 (dynamin2<sup>K44A</sup>) were serum-starved and stimulated with PDGF-BB ( $50 \text{ ng ml}^{-1}$ ) or H<sub>2</sub>O<sub>2</sub> (1  
861 mM) for 10 min, and subjected to dimedone-PLA. Representative images of co-staining of  
862 dimedone-PLA (gray) and EGFP (green) are shown for each condition from one of 2  
863 independent experiments. The graph represents the average number of PLA signals per cell  
864 ( $n = 15$  cells), relative to unstimulated control cells (normalized to 1). \*\*\* $P < 0.0001$ , ns: not  
865 significant, ANOVA with Bonferroni/Dunn's post-hoc test. Scale bar: 50  $\mu\text{m}$ . Error bars  
866 represent SD.

867

868 **Fig. 4.** NOX complexes catalyze PDGF-evoked SHP2 oxidation. **(a)** Serum-starved Swiss  
869 3T3 cells expressing EGFP or cytoplasmic catalase were stimulated with PDGF-BB (50 ng  
870 ml<sup>-1</sup>) or H<sub>2</sub>O<sub>2</sub> (1 mM) for 10 min and subjected to dimedone-PLA (gray). Representative  
871 images are shown for each condition from one of 2 independent experiments. **(b)**  
872 Serum-starved Swiss 3T3 cells were left untreated or were pre-treated with DPI (2.5 μM)  
873 (*top*) or imipramine-blue (6 μM) (*bottom*) for 5 min, stimulated with PDGF-BB (50 ng  
874 ml<sup>-1</sup>) or H<sub>2</sub>O<sub>2</sub> (1 mM) for 10 min and subjected to dimedone-PLA (gray). Representative  
875 images are shown for each condition from one of 2 independent experiments. **(c)**  
876 Serum-starved primary murine dermal fibroblasts (MDFs) from wild type (WT) or *Nox1*,  
877 2,4 triple-KO (TKO) mice were stimulated with PDGF-BB (50 ng ml<sup>-1</sup>) or H<sub>2</sub>O<sub>2</sub> (1 mM)  
878 for 10 min and subjected to dimedone-PLA (gray). Representative images are shown for  
879 each condition from one of 3 independent experiments. **(a-c)** The graphs show the average  
880 number of PLA signals per cell (*n* = 6 images for each condition, 5-15 cells in an image),  
881 relative to control cells (normalized to 1). Error bars represent SD. \*\*\**P*<0.0001, ns: not  
882 significant, ANOVA with Bonferroni/Dunn's post-hoc test. Scale bar: 50 μm. **(d)**  
883 Serum-starved Swiss 3T3 cells were stimulated with PDGF-BB (50 ng ml<sup>-1</sup>) for 10 min,  
884 and fixed in the presence of dimedone. Representative co-staining of ox-SHP2, detected by  
885 dimedone-PLA (magenta), and the indicated NOX components (green) are shown from one  
886 of 3 independent experiments (*top*). Nuclei were stained with DAPI (blue). Higher  
887 magnification images of the boxed regions are shown. Scale bar: 10 μm. Median distances

888 of centers of mass (CM) between punctate signals of ox-SHP2 and the nearest indicated  
889 NOX protein signal in cells were obtained by the object-based image analysis. Box-whisker  
890 plots show median distances at 10 min after PDGF stimulation ( $n = 50$  cells). Boxes  
891 represent the 25<sup>th</sup>-75<sup>th</sup> percentiles and whiskers the 5<sup>th</sup>-95<sup>th</sup> percentiles.

892

893 **Fig. 5.** PDGF evokes redoxosome formation. (a) Serum-starved Swiss 3T3 cells were  
894 stimulated with PDGF-BB ( $50 \text{ ng ml}^{-1}$ ) for 5 min, then immunostained with anti-PDGFR $\beta$   
895 (magenta) and the indicated anti-NOX component antibodies (green). Representative  
896 images are shown for each condition from one of 2 independent experiments. Nuclei were  
897 stained with DAPI (blue). Scale bar: 10  $\mu\text{m}$ . The graph shows the average value of  
898 Pearson's coefficient for PDGFR $\beta$  and indicated NOX components with or without  
899 PDGF-BB stimulation ( $n = 1$  ROI from each of 10 cells) \*\*\* $P < 0.0001$ ; two-tailed Welch's  $t$   
900 test. (b) Serum-starved Swiss 3T3 cells expressing cytoplasmic HyPer3 (HyPer3-cyto),  
901 plasma membrane-targeted HyPer3 (HyPer3-tk), RAB5-fused HyPer3 (HyPer3-RAB5) or  
902 RAB7-fused HyPer3 (HyPer3-RAB7) were subjected to live-cell, time-lapse imaging. Top  
903 panels: Fluorescence intensity (pseudo-colored) of each HyPer3 construct shown at one  
904 minute intervals PDGF-BB ( $50 \text{ ng ml}^{-1}$ ) was added (arrow) after the third scan. Bottom  
905 panel: Graph shows the means of the relative fluorescence intensities of individual cells ( $n$   
906 = 7 cells from each independent time-lapse experiment), setting the average of the first 3  
907 time-points to 1 (*bottom*). Error bars represent SEM.

908

909 **Fig. 6.** NOX activity is necessary for PDGF signaling. (a) Serum-starved WT- or  
910 TKO-MDFs were stimulated with PDGF-BB (50 ng ml<sup>-1</sup>) for the indicated times. Lysates  
911 were subjected to immunoblotting with the indicated antibodies. Representative  
912 immunoblots are shown from one of 4 experiments. See also Supplementary Fig. 5a. Graph  
913 at right shows percentage change in phosphorylation of the indicated PDGFR $\beta$  tyrosine  
914 residues in WT- and TKO-MDFs at the indicated times post-stimulation, quantified from  
915 immunoblots ( $n = 4$ ). Error bars represent SD. (b) Serum-starved WT- or TKO-MDFs were  
916 stimulated with PDGF-BB (50 ng ml<sup>-1</sup>) for the indicated times. Lysates were subjected to  
917 immunoblotting with anti-pMEK1/2 and anti-MEK1 antibodies. Representative  
918 immunoblots are shown from one of 4 experiments. The graph shows the relative  
919 phosphorylation of MEK1, quantified from the immunoblots ( $n = 4$ ), with the value in  
920 WT-MDFs at 5 min after PDGF stimulation set to 1. Data represent means  $\pm$ SD. (c)  
921 Serum-starved WT- or TKO-MDFs were pre-treated with SHP099 (5  $\mu$ M) or vehicle for 30  
922 min, and stimulated with PDGF-BB (50 ng ml<sup>-1</sup>) for 2.5 min. Lysates were subjected to  
923 immunoblotting with the indicated antibodies. Representative immunoblots are shown from  
924 one of 4 experiments. The graph shows the relative phosphorylation of the indicated  
925 PDGFR $\beta$  tyrosine residues, quantified from immunoblots ( $n = 4$ ) with the values from  
926 untreated WT- MDF set to 1. Data represent means  $\pm$ SD. Values for each phosphotyrosine  
927 residue in TKO-MDFs with or without SHP099 treatment were compared by paired

928 two-tailed  $t$  tests. **(d)** Schematic of PDGF-evoked redoxosome formation and SHP2

929 oxidation. See text for details.

930



Fig. 1

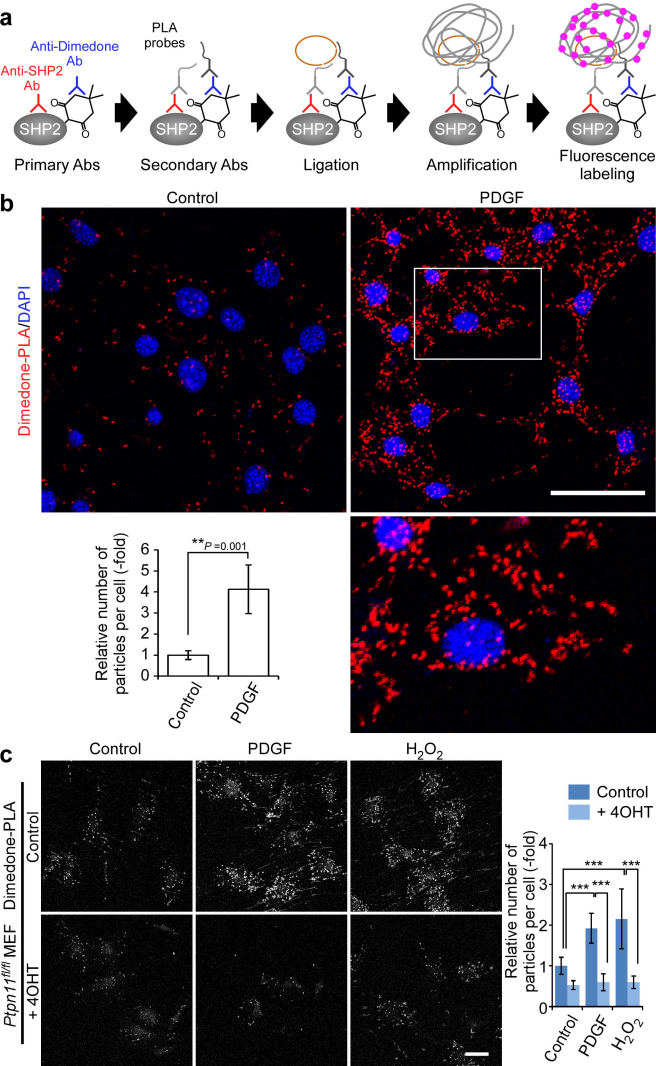

Fig. 2

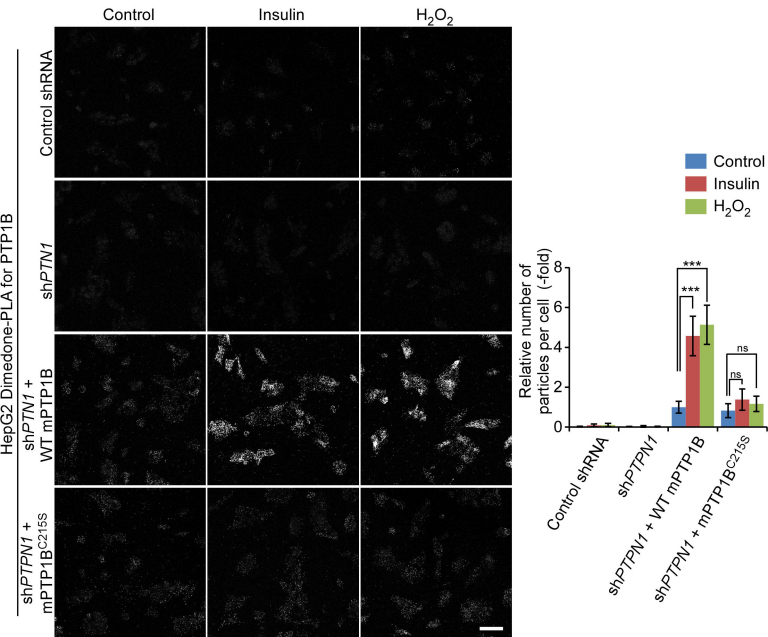

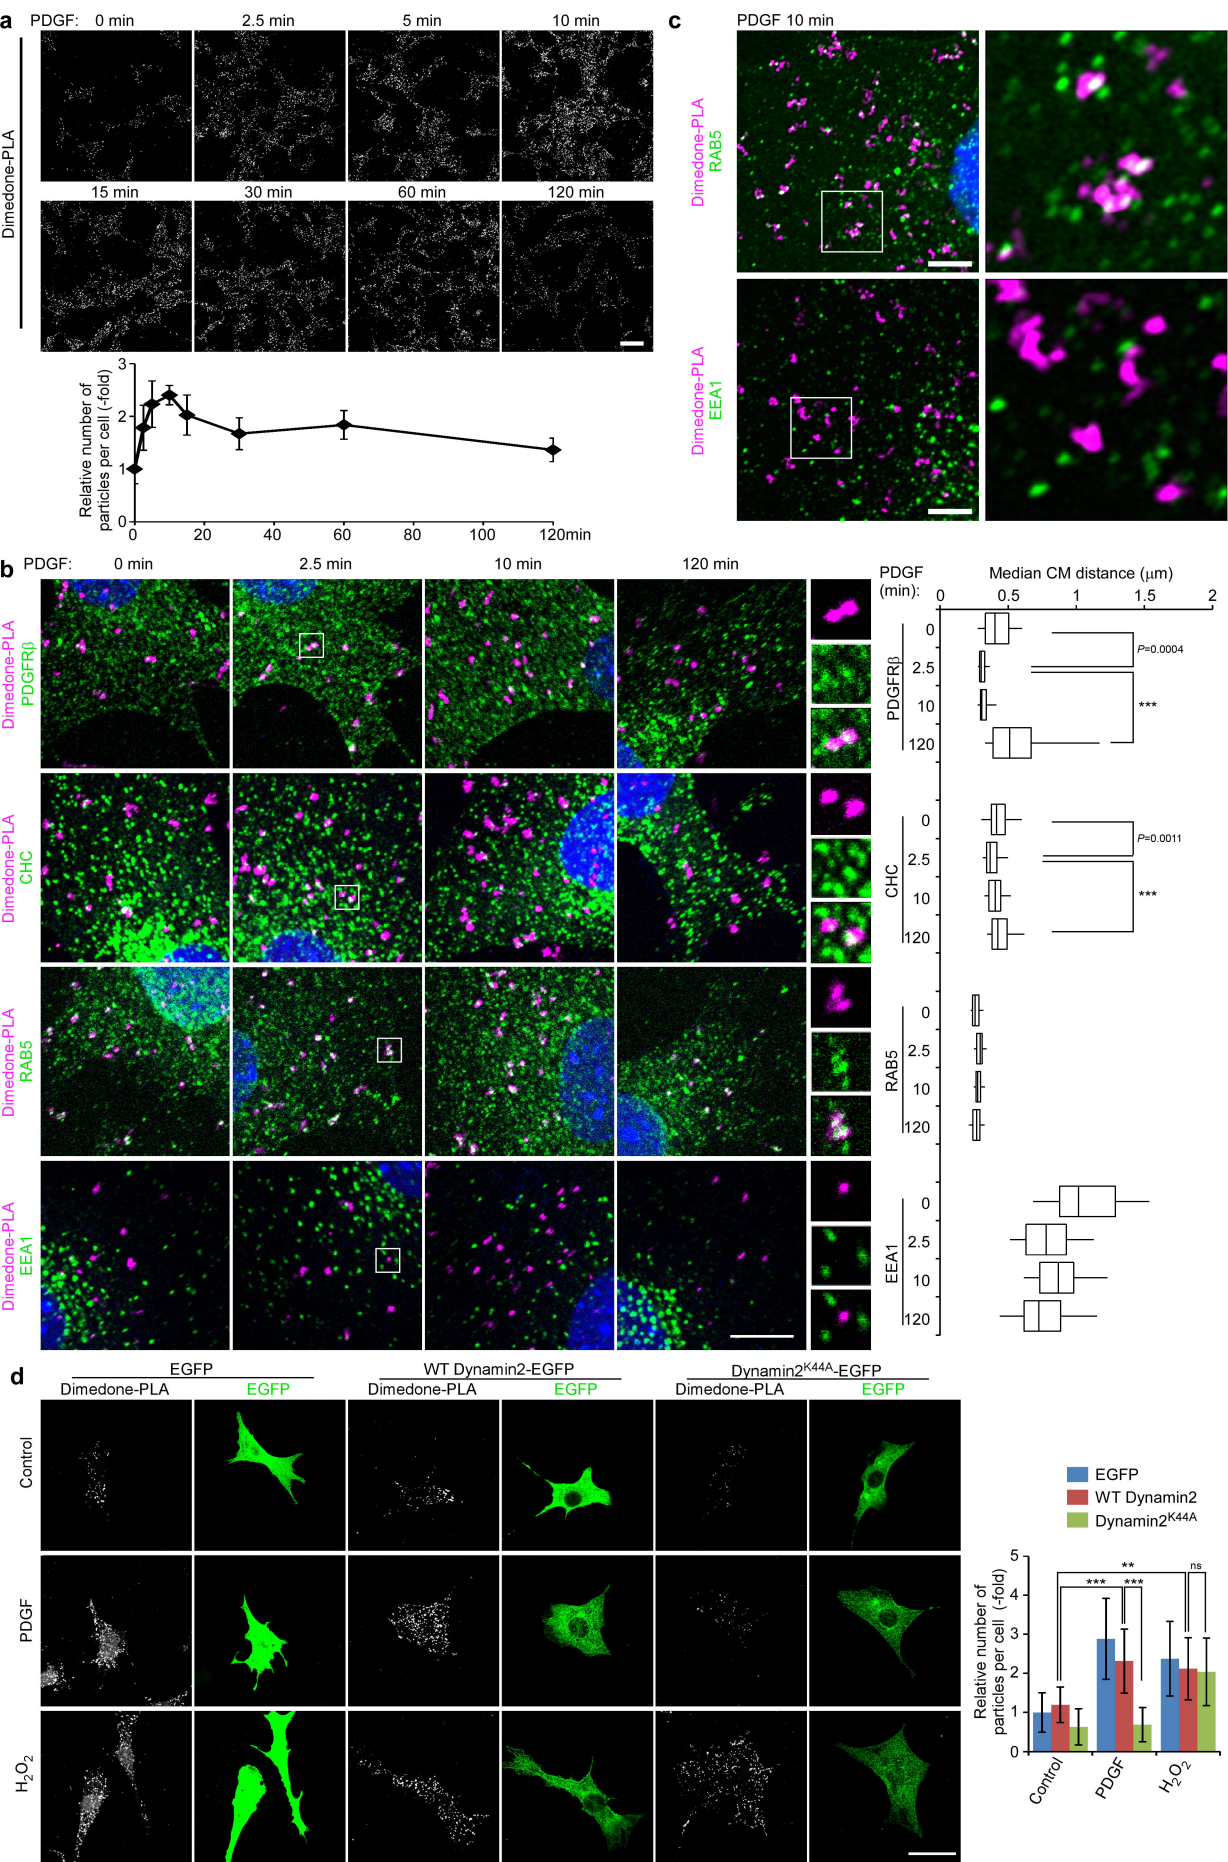



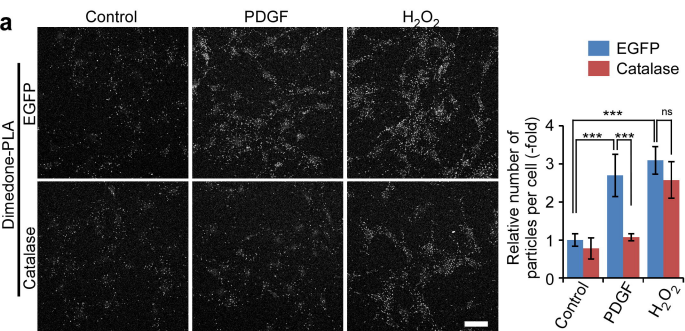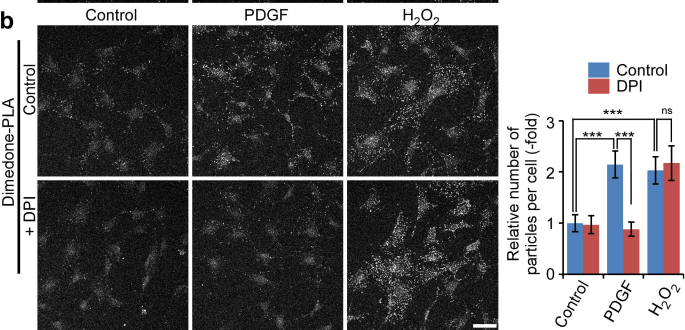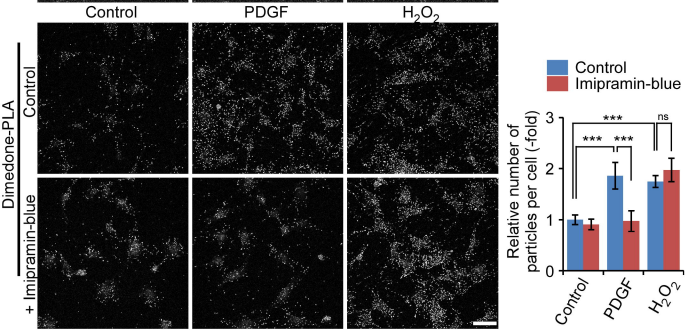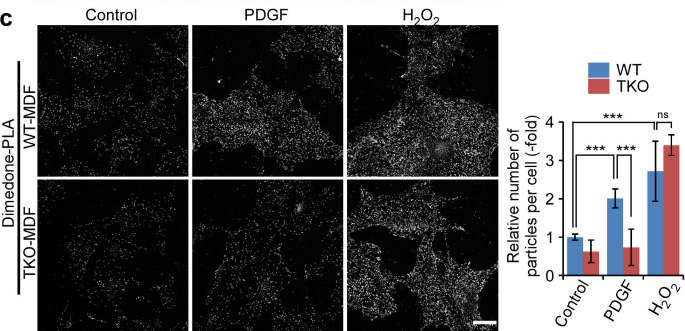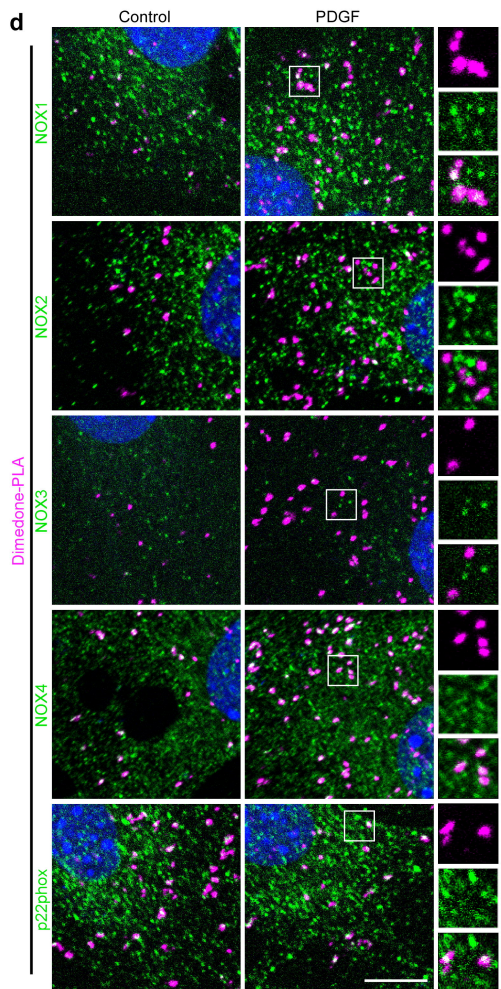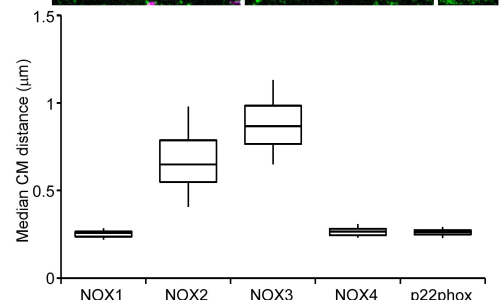



Fig. 5

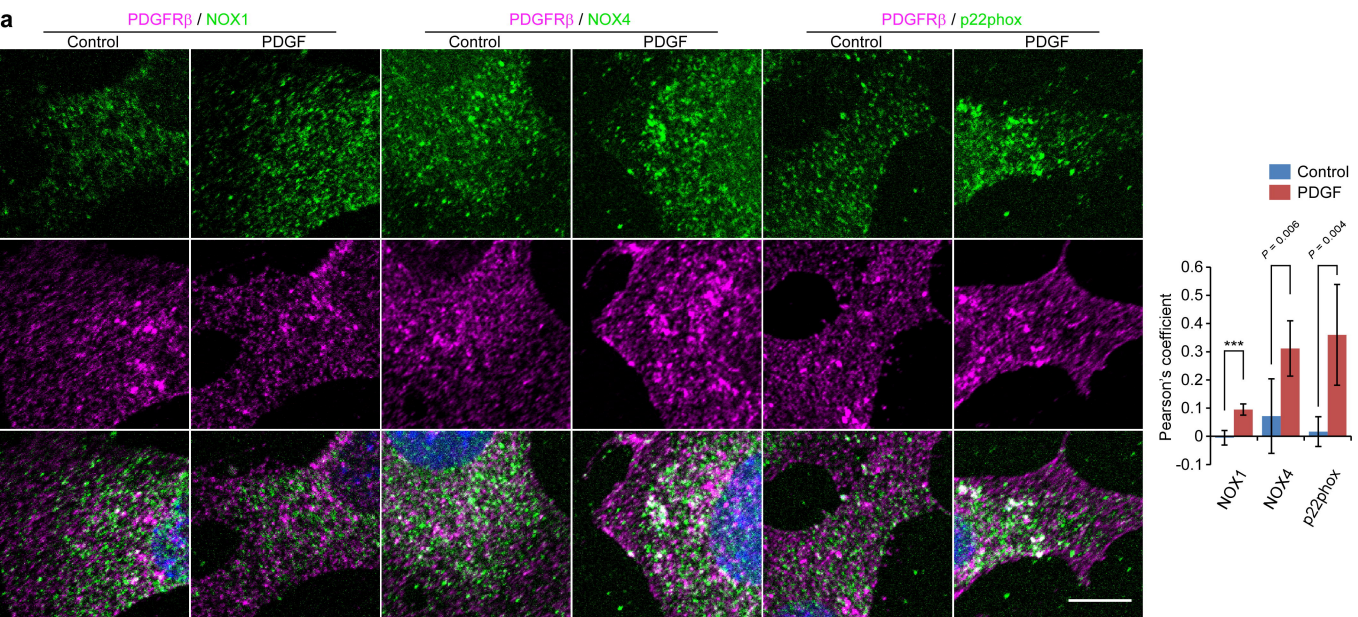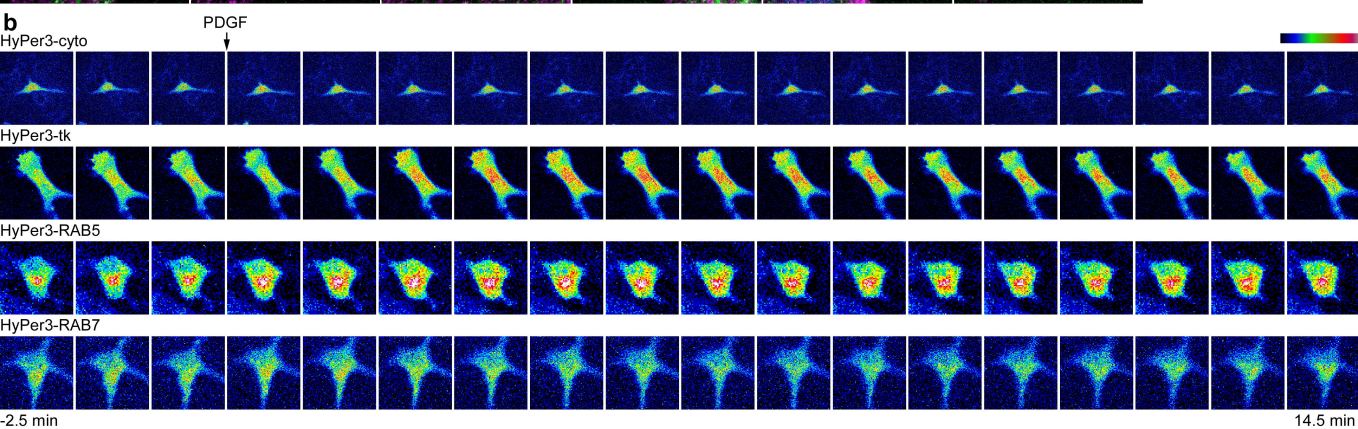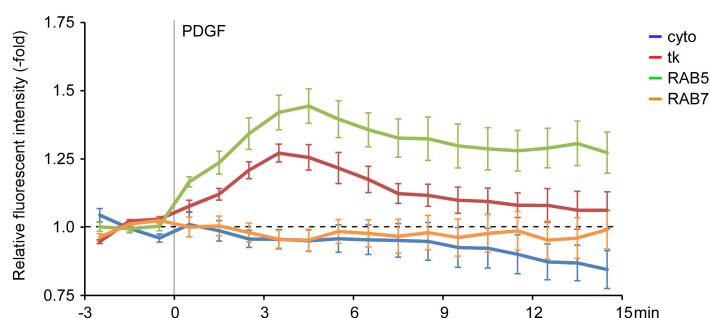

**Fig. 6**

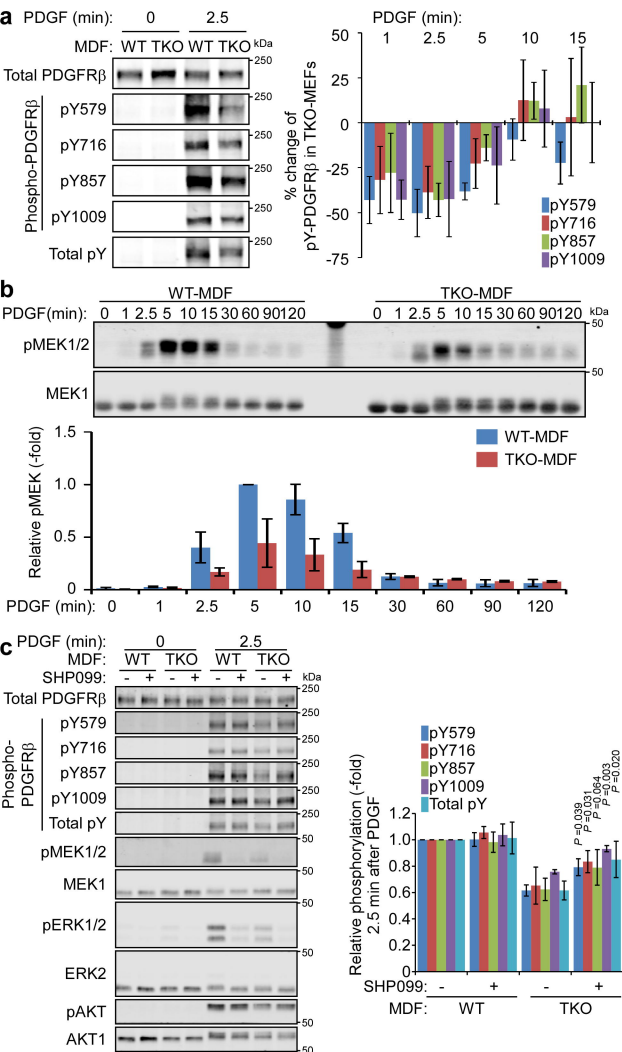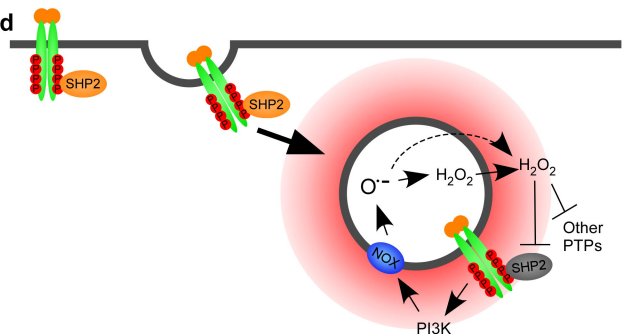

Source: http://www.biorxiv.org/content/10.1101/157750v1.full.pdf
